# Supplementary material for: A single layer artificial neural network type architecture with molecular engineered bacteria for reversible and irreversible computing
Source: Royal Society of Chemistry journal article supplement (doi:10.1039/d1sc01505b), 2021-01-01
Supplement: d1sc01505b1.pdf [file d1sc01505b1.pdf]

## Supplementary Information

### **A single layer artificial neural network type architecture with molecular engineered bacteria for reversible and irreversible computing**

Kathakali Sarkar<sup>1,2</sup>, Deepro Bonnerjee<sup>1,2</sup>, Rajkamal Srivastava<sup>1,2</sup>, Sangram Bagh<sup>1,\*</sup>

<sup>1</sup>Biophysics and Structural Genomics Division, Saha Institute of Nuclear Physics, Homi Bhabha National Institute (HBNI), Block A/F, Sector-I, Bidhannagar, Kolkata 700064 INDIA

<sup>2</sup> Equal contributions

\* Corresponding author

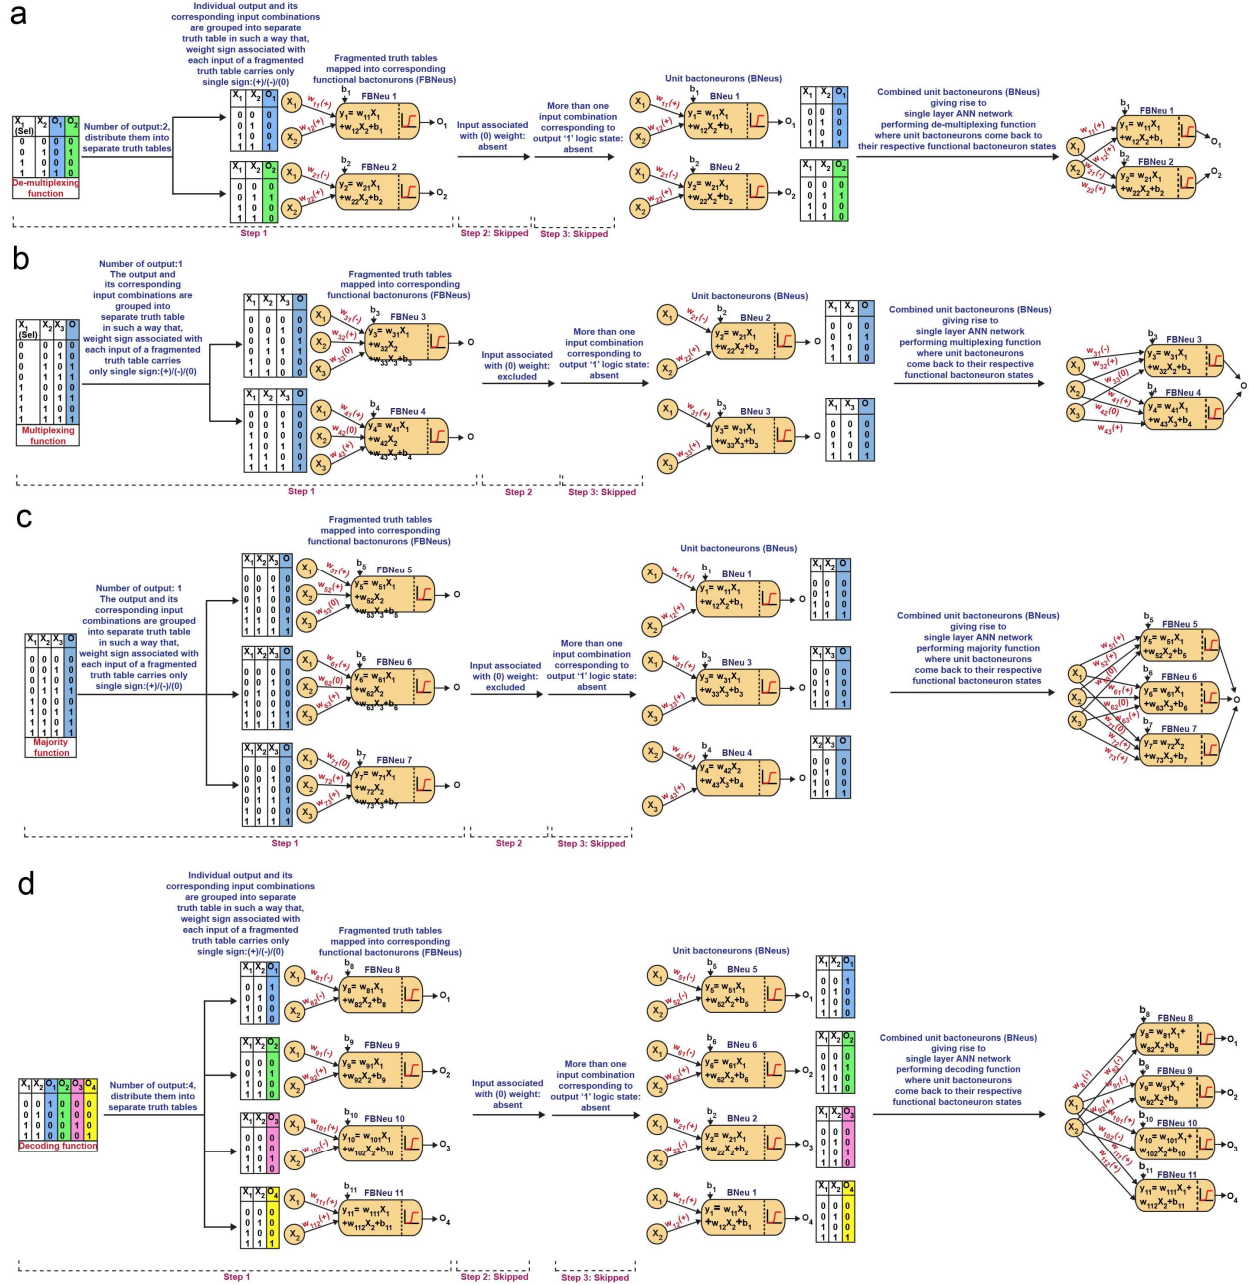

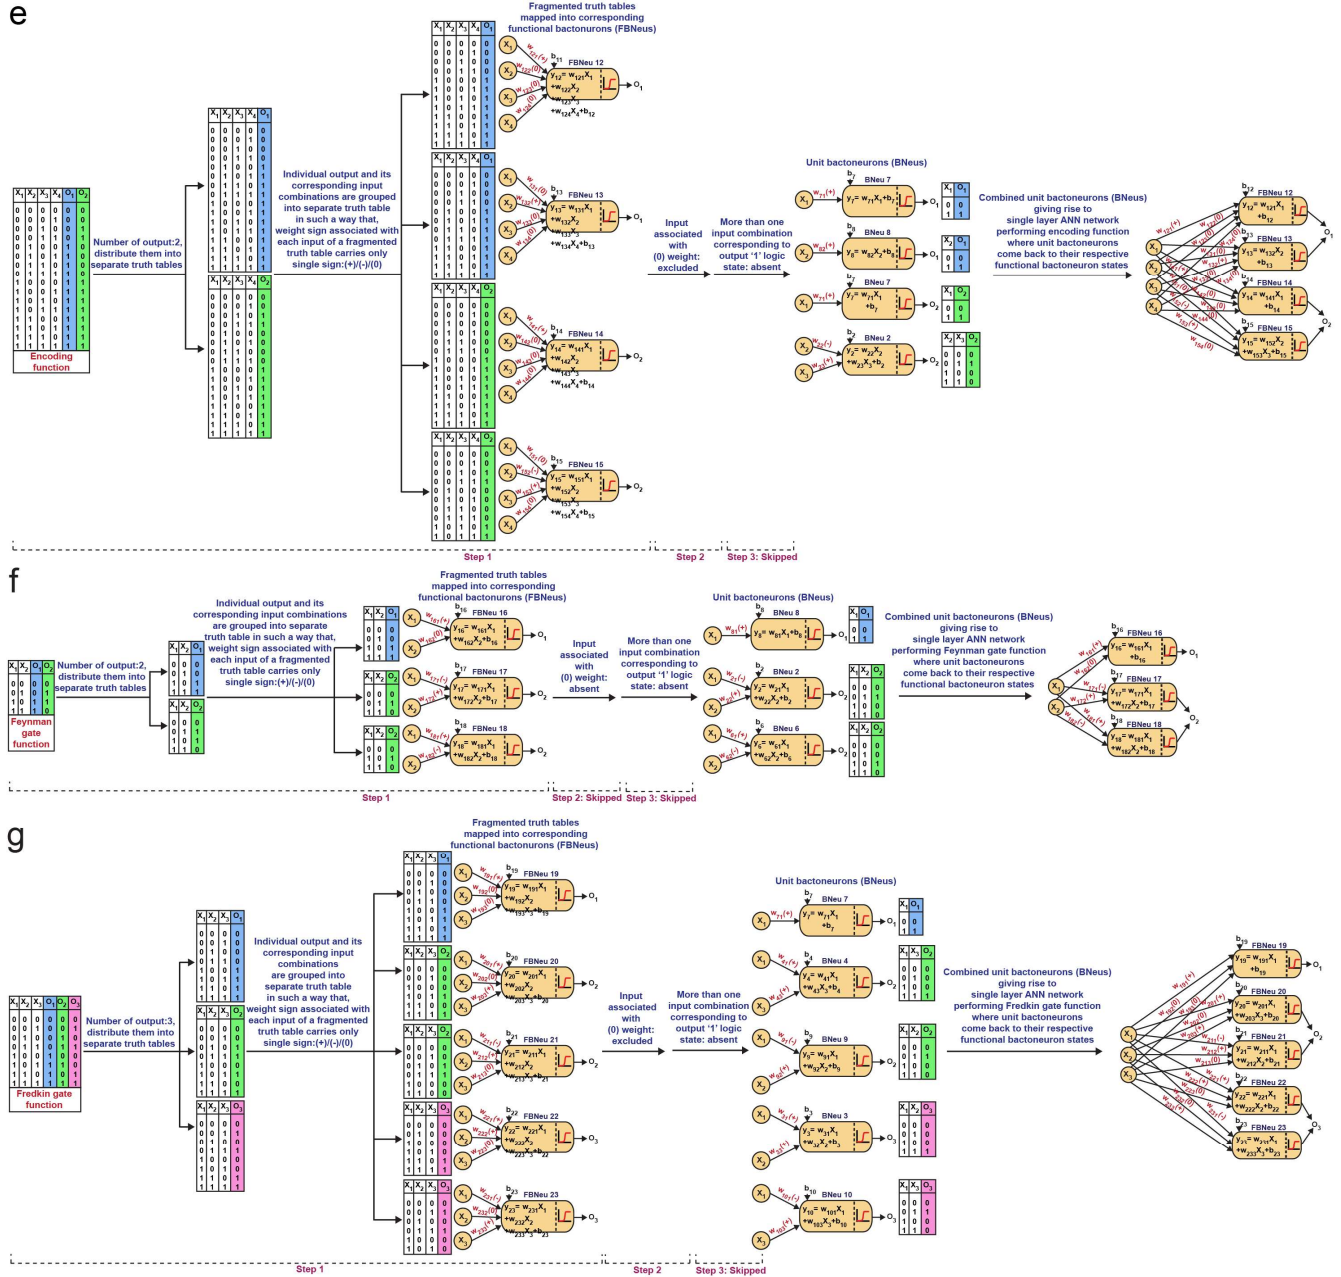

**Figure S1: Derivation of functional and unit bactoneurons for a) de-multiplexing function, b) multiplexing function, c) majority function, d) decoding function, e) encoding function, f) Feynman gate function and g) Fredkin gate function.** In each case, combination of unit bactoneurons gives rise to single layer ANN architecture where, individual unit bactoneurons come back to their corresponding functional bactoneuron states while they get associated with '0' weighted inputs (If any). In the network level, parts of the summation function of each functional bactoneuron, contributed by '0' weighted input, are not shown.

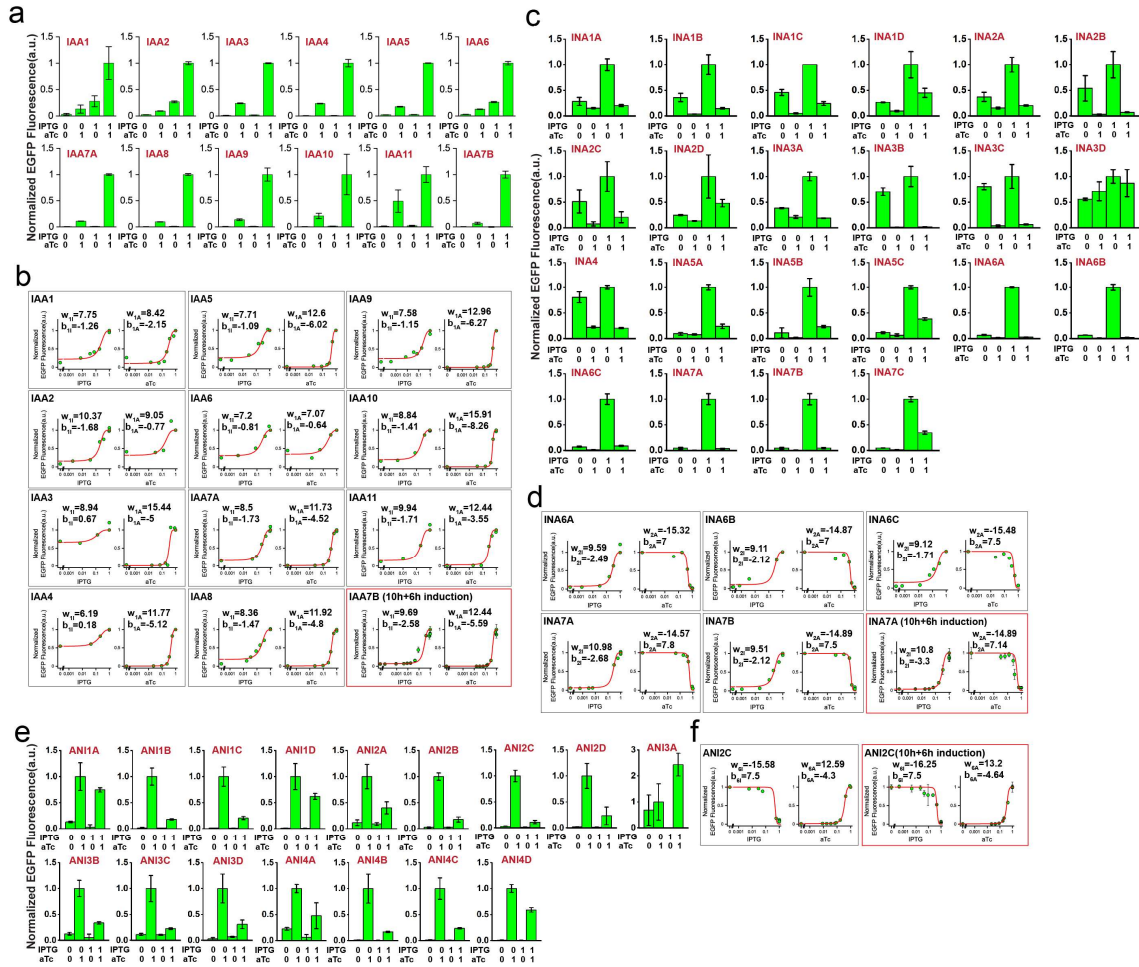

**Figure S2: Details of characterization and dose responses of BNeus 1, 2 and 6.** Expression characterization of **a)** BNeu 1, **c)** BNeu 2 and **e)** BNeu 6 and dose responses of **b)** BNeu 1, **d)** BNeu 2 and **f)** BNeu 6.

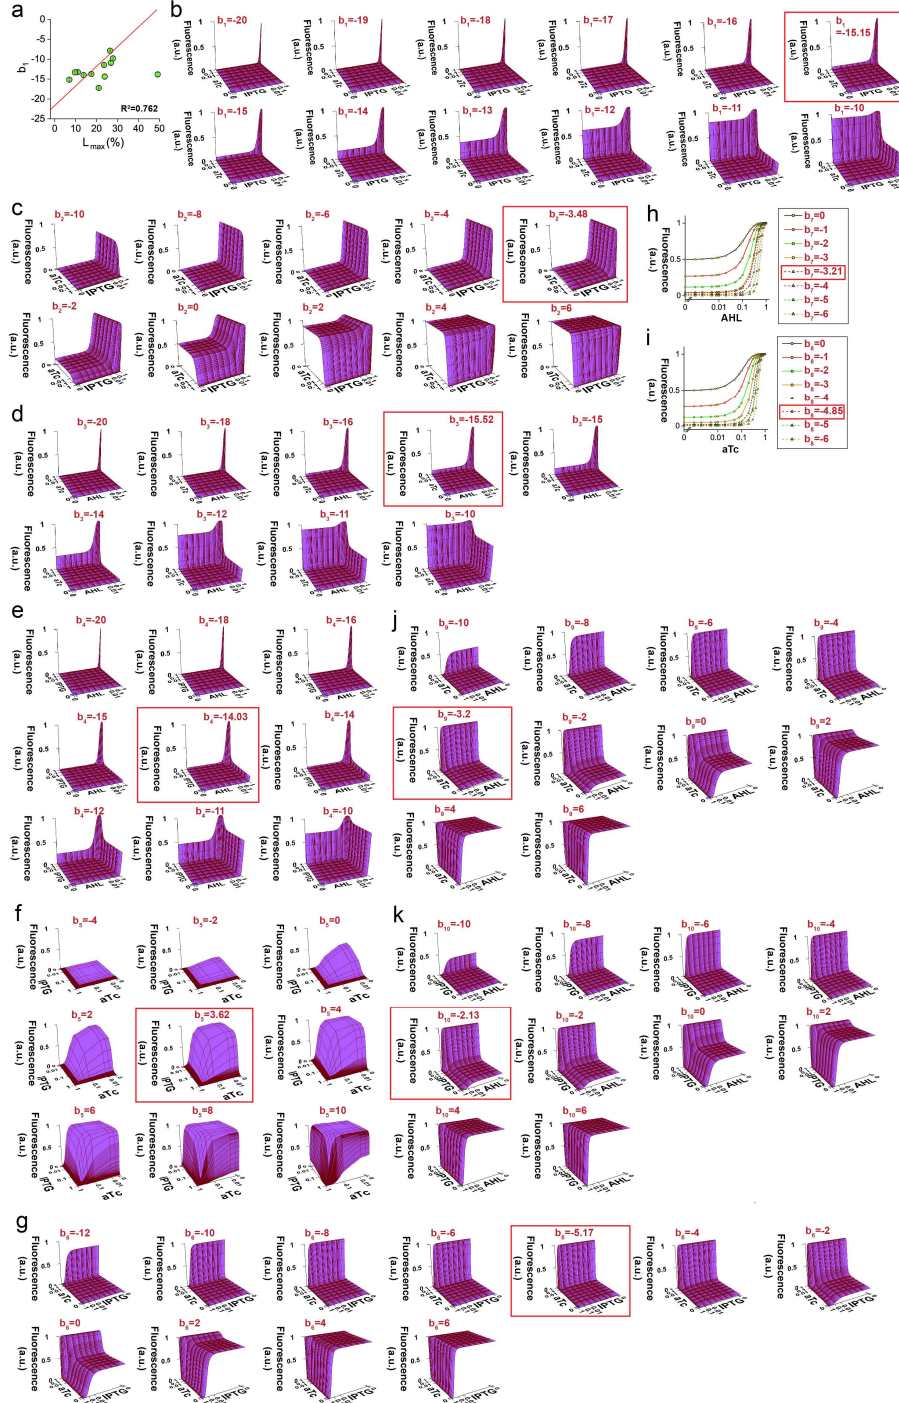

**Figure S3: Correlation between bias and leakage of a Unit bactoneuron.** a) Correlation between bias ( $b_1$ ) and the percentage highest leakage ( $L_{max}(\%)$ ) for all BNeu 1 cellular devices obtained from weight and bias adjustment steps. Simulated output behaviors of b) BNeu 1, c) BNeu 2 d) BNeu 3 e) BNeu 4, f) BNeu 5, g) BNeu 6, h) BNeu 7, i) BNeu 8, j) BNeu 9 and k) BNeu 10. Simulation corresponding to the bias value obtained experimentally for each bactoneuron is shown in red box.



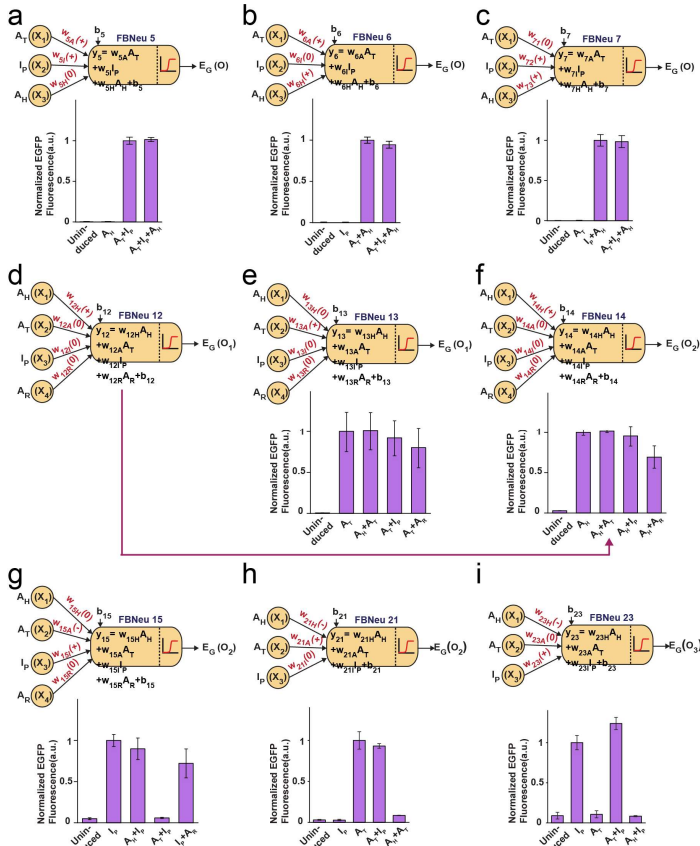

**Figure S5: Characterizations of functional bactoneurons associated with weight=0 towards specific inducers.** Each functional bactoneuron population was subjected to 10h+6h induction with a set of inducers which was chosen based on the neural architecture of individual functional bactoneurons, and then characterized in terms of EGFP expression. If the presence or absence of a specific inducer didn't change the output of the functional bactoneuron, then only we considered that, the inducer was associated with zero weight. Neural architectures and validation for '0' weighted input(s) of functional bactoneurons are shown. FBNeu 20 and FBNeu 22 from Fredkin gate function are equivalent to FBNeu 7 and FBNeu 6 respectively except their different outputs. Therefore, individual weight '0' input validation for FBNeus 6 and 7 justifies the same for FBNeus 22 and 20 as well. FBNeu

12 and FBNeu 14 are similar except their outputs. Here, individual functional bactoneurons are characterized in terms of EGFP output. Therefore, both FBNeu 12 and FBNeu 14 produce EGFP output and hence, they become identical. Thus, they share common '0' weighted input validation data (Shown with magenta arrow). FBNeu 16 from Feynman gate function is a sub-set of FBNeu 13 as it operates on lesser number of inputs whereas, their corresponding unit bactoneuron is common. Therefore, weight '0' input of FBNeu 16 can be validated from the characterization result of FBNeu 13. Similarly, weight '0' inputs of Fredkin gate functional bactoneuron FBNeu 19 can be validated by characterization result of FBNeu 12/14.

**ab**

| Selector | aTc             | 0 | 0 | 1 | 1 |
|----------|-----------------|---|---|---|---|
| Input    | IPTG            | 0 | 1 | 0 | 1 |
| Output   | EGFP (O1)       |   |   |   |   |
|          | E2-Crimson (O2) |   |   |   |   |
|          | DIC             |   |   |   |   |
|          | MERGE           |   |   |   |   |

| Selector | aTc   | 0 | 0 | 0 | 0 | 1 | 1 | 1 | 1 |
|----------|-------|---|---|---|---|---|---|---|---|
| Input    | IPTG  | 0 | 0 | 1 | 1 | 0 | 0 | 1 | 1 |
|          | AHL   | 0 | 1 | 0 | 1 | 0 | 1 | 0 | 1 |
| Output   | EGFP  |   |   |   |   |   |   |   |   |
|          | DIC   |   |   |   |   |   |   |   |   |
|          | MERGE |   |   |   |   |   |   |   |   |

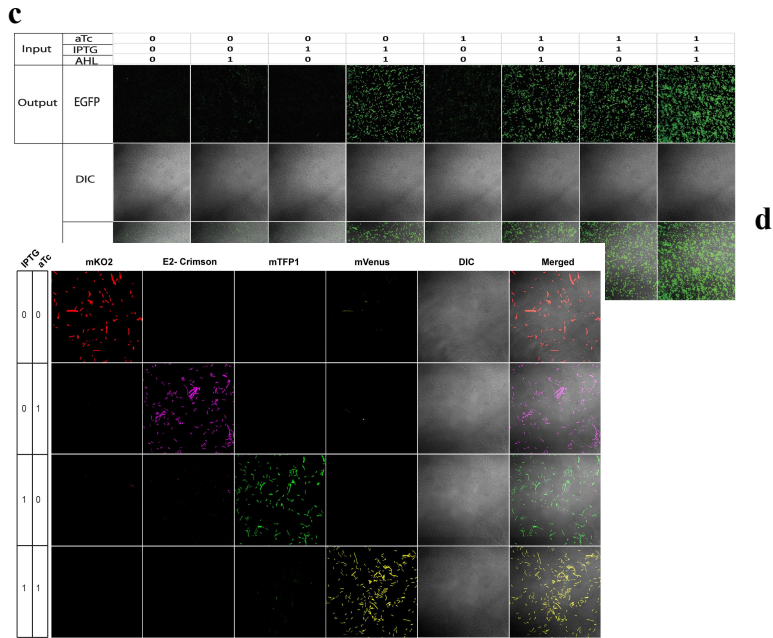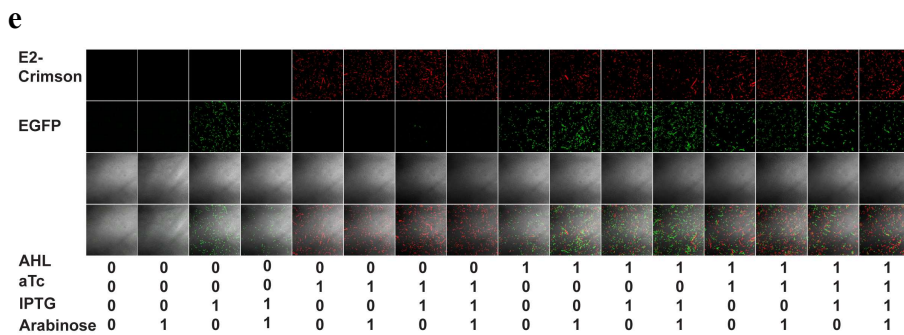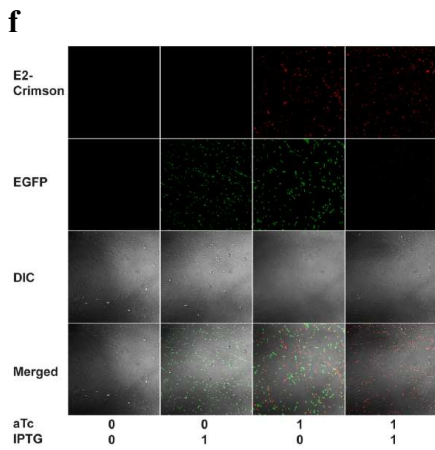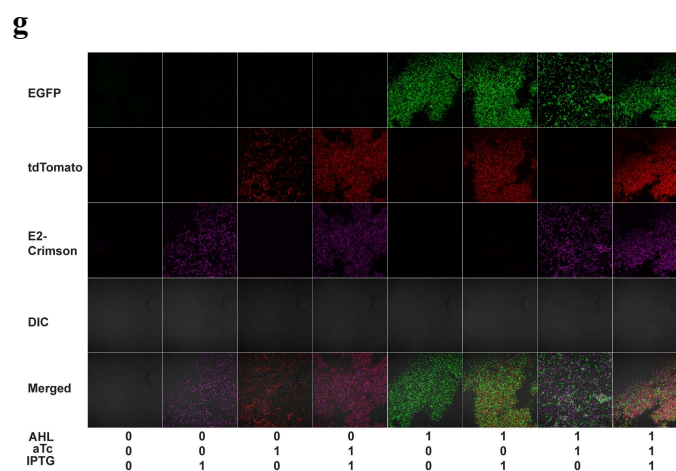

**Figure S6: Microscopy images with corresponding differential interference contrast (DIC) and merged channels.** Populations of different combinations of bactoneurons, depending on the complex functions they constitute, were co-cultured with appropriate inductions where, they together formed a bactoneural layer. They were viewed under relevant laser channels and emission filters. DIC images show a heterogenous population of cells in the field with each sub-population responding uniquely to the induction conditions. A bactoneuron's activation is reported by fluorescence from its respective output protein



whereas inactive bactoneurons show no fluorescence. Microscopic images for the bactoneuron-based single layer ANN type architectures for **a)** de-multiplexing function, **b)** multiplexing function, **c)** majority function, **d)** decoding function, **e)** encoding function, **f)** reversible Feynman gate and **g)** reversible Fredkin gate are shown.

**Table S1: Details of functional bactoneurons and corresponding unit bactoneurons associated with the computing functions developed in this study.** Output fluorescent proteins and activation function equations corresponding to unit bactoneurons are also described.

| Serial number | Function          | Functional bactoneurons (FBNeus) | Unit bactoneurons (BNeus)                                                           | Output of unit bactoneurons | Activation function Equation                                                     |
|---------------|-------------------|----------------------------------|-------------------------------------------------------------------------------------|-----------------------------|----------------------------------------------------------------------------------|
| 1             | De-multiplexing   |                                  |                                                                                     | E1, E2                      | $O_1 = \frac{1}{1 + e^{-(w_{11}I_1 + w_{12}I_2 + b_1)}}$                         |
|               |                   |                                  |                                                                                     | E1, E2                      | $O_2 = \frac{1}{1 + e^{-(w_{21}I_1 + w_{22}I_2 + b_1)}}$                         |
|               | Multiplexing      |                                  |                                                                                     | E1, E2                      | $O = \frac{1}{1 + e^{-(w_{11}I_1 + w_{12}I_2 + b_1)}}$                           |
|               |                   |                                  |                                                                                     | E1, E2                      | $O = \frac{1}{1 + e^{-(w_{21}I_1 + w_{22}I_2 + b_1)}}$                           |
| 3             | Majority function |                                  |                                                                                     | E1, E2                      | $O_1 = \frac{1}{1 + e^{-(w_{11}I_1 + w_{12}I_2 + w_{13}I_3 + b_1)}}$             |
|               |                   |                                  |                                                                                     | E1, E2                      | $O_3 = \frac{1}{1 + e^{-(w_{21}I_1 + w_{22}I_2 + w_{23}I_3 + b_1)}}$             |
|               |                   |                                  |                                                                                     | E1, E2                      | $O_4 = \frac{1}{1 + e^{-(w_{11}I_1 + w_{12}I_2 + w_{13}I_3 + b_1)}}$             |
| 4             | Decoding          |                                  |                                                                                     | E1, E2                      | $O_5 = \frac{1}{1 + e^{-(w_{11}I_1 + w_{12}I_2 + w_{13}I_3 + b_1)}}$             |
|               |                   |                                  |                                                                                     | E1, E2                      | $O_6 = \frac{1}{1 + e^{-(w_{21}I_1 + w_{22}I_2 + w_{23}I_3 + b_1)}}$             |
| 5             | Encoding          |                                  |                                                                                     | E1, E2                      | $O_2 = \frac{1}{1 + e^{-(w_{21}I_1 + w_{22}I_2 + w_{23}I_3 + b_1)}}$             |
|               |                   |                                  |                                                                                     | E1, E2                      | $O_1 = \frac{1}{1 + e^{-(w_{11}I_1 + w_{12}I_2 + w_{13}I_3 + b_1)}}$             |
|               |                   |                                  |                                                                                     | E1, E2                      | $O_7 = \frac{1}{1 + e^{-(w_{11}I_1 + w_{12}I_2 + w_{13}I_3 + b_1)}}$             |
|               |                   |                                  |                                                                                     | E1, E2                      | $O_8 = \frac{1}{1 + e^{-(w_{21}I_1 + w_{22}I_2 + w_{23}I_3 + b_1)}}$             |
|               |                   |                                  |                                                                                     | E1, E2                      | $O_9 = \frac{1}{1 + e^{-(w_{11}I_1 + w_{12}I_2 + w_{13}I_3 + b_1)}}$             |
|               |                   |                                  |                                                                                     | E1, E2                      | $O_2 = \frac{1}{1 + e^{-(w_{21}I_1 + w_{22}I_2 + w_{23}I_3 + b_1)}}$             |
|               |                   |                                  |                                                                                     | E1, E2                      | $O_8 = \frac{1}{1 + e^{-(w_{11}I_1 + w_{12}I_2 + w_{13}I_3 + b_1)}}$             |
| 6             | Feynman gate      |                                  |                                                                                     | E1, E2                      | $O_2 = \frac{1}{1 + e^{-(w_{21}I_1 + w_{22}I_2 + w_{23}I_3 + w_{24}I_4 + b_1)}}$ |
|               |                   |                                  |                                                                                     | E1, E2                      | $O_6 = \frac{1}{1 + e^{-(w_{11}I_1 + w_{12}I_2 + w_{13}I_3 + w_{14}I_4 + b_1)}}$ |
|               |                   |                                  |                                                                                     | E1, E2                      | $O_7 = \frac{1}{1 + e^{-(w_{21}I_1 + w_{22}I_2 + w_{23}I_3 + w_{24}I_4 + b_1)}}$ |
|               | Fredkin gate      |                                  |                                                                                     | E1, E2                      | $O_4 = \frac{1}{1 + e^{-(w_{11}I_1 + w_{12}I_2 + w_{13}I_3 + w_{14}I_4 + b_1)}}$ |
|               |                   |                                  |                                                                                     | E1, E2                      | $O_9 = \frac{1}{1 + e^{-(w_{21}I_1 + w_{22}I_2 + w_{23}I_3 + w_{24}I_4 + b_1)}}$ |
|               |                   |                                  |                                                                                     | E1, E2                      | $O_8 = \frac{1}{1 + e^{-(w_{11}I_1 + w_{12}I_2 + w_{13}I_3 + w_{14}I_4 + b_1)}}$ |
|               |                   | E1, E2                           | $O_{10} = \frac{1}{1 + e^{-(w_{21}I_1 + w_{22}I_2 + w_{23}I_3 + w_{24}I_4 + b_1)}}$ |                             |                                                                                  |

**Table S2: List of cellular devices constructed in this study.**

| Unit bactoneuro | Cellular device | Output cassette components | Regulatory cassette components |
|-----------------|-----------------|----------------------------|--------------------------------|
|-----------------|-----------------|----------------------------|--------------------------------|

|         |                               | Promoter –gene cassette      | RBS      | Ori   | Antibiotic selection     | Promoter-regulator cassette                                                            | RBS  | Ori   | Antibiotic selection |
|---------|-------------------------------|------------------------------|----------|-------|--------------------------|----------------------------------------------------------------------------------------|------|-------|----------------------|
| BNeu1   | IAA1                          | P <sub>IAA1</sub> -EGFP      | R        | pUC   | Amp                      | -                                                                                      | -    | -     | -                    |
|         | IAA2                          | P <sub>IAA2</sub> -EGFP      | R        | pUC   | Amp                      | -                                                                                      | -    | -     | -                    |
|         | IAA3                          | P <sub>IAA3</sub> -EGFP      | R        | pUC   | Amp                      | -                                                                                      | -    | -     | -                    |
|         | IAA4                          | P <sub>IAA4</sub> -EGFP      | R        | pUC   | Amp                      | -                                                                                      | -    | -     | -                    |
|         | IAA5                          | P <sub>IAA5</sub> -EGFP      | R        | pUC   | Amp                      | -                                                                                      | -    | -     | -                    |
|         | IAA6                          | P <sub>IAA6</sub> -EGFP      | R        | pUC   | Amp                      | -                                                                                      | -    | -     | -                    |
|         | IAA7A                         | P <sub>IAA7</sub> -EGFP      | R        | pUC   | Amp                      | -                                                                                      | -    | -     | -                    |
|         | IAA7B                         | P <sub>IAA7</sub> -EGFP      | R        | p15A  | Cm                       | -                                                                                      | -    | -     | -                    |
|         | IAA8                          | P <sub>IAA8</sub> -EGFP      | R        | pUC   | Amp                      | -                                                                                      | -    | -     | -                    |
|         | IAA9                          | P <sub>IAA9</sub> -EGFP      | R        | pUC   | Amp                      | -                                                                                      | -    | -     | -                    |
|         | IAA10                         | P <sub>IAA10</sub> -EGFP     | R        | pUC   | Amp                      | -                                                                                      | -    | -     | -                    |
| IAA11   | P <sub>IAA11</sub> -EGFP      | R                            | pUC      | Amp   | -                        | -                                                                                      | -    | -     |                      |
| IAA7B.A | P <sub>IAA7</sub> -E2-Crimson | R                            | p15A     | Cm    | -                        | -                                                                                      | -    | -     |                      |
| IAA7B.B | P <sub>IAA7</sub> -mVenus     | R                            | p15A     | Cm    | -                        | -                                                                                      | -    | -     |                      |
| BNeu2   | INA1A                         | P <sub>INA1</sub> -EGFP      | R        | pUC   | Amp                      | P <sub>LtetO-1</sub> -CI                                                               | R    | p15A  | Cm                   |
|         | INA1B                         |                              | R        | pUC   | Amp                      | P <sub>LtetO-1</sub> -CI                                                               | RC1  | p15A  | Cm                   |
|         | INA1C                         |                              | R        | pUC   | Amp                      | P <sub>LtetO-1</sub> -CI                                                               | RC2  | p15A  | Cm                   |
|         | INA1D                         |                              | R        | pUC   | Amp                      | P <sub>LtetO-1</sub> -CI                                                               | RC3  | p15A  | Cm                   |
|         | INA2A                         | P <sub>INA2</sub> -EGFP      | R        | pUC   | Amp                      | P <sub>LtetO-1</sub> -CI                                                               | R    | p15A  | Cm                   |
|         | INA2B                         |                              | R        | pUC   | Amp                      | P <sub>LtetO-1</sub> -CI                                                               | RC1  | p15A  | Cm                   |
|         | INA2C                         |                              | R        | pUC   | Amp                      | P <sub>LtetO-1</sub> -CI                                                               | RC2  | p15A  | Cm                   |
|         | INA2D                         |                              | R        | pUC   | Amp                      | P <sub>LtetO-1</sub> -CI                                                               | RC3  | p15A  | Cm                   |
|         | INA3A                         | P <sub>INA3</sub> -EGFP      | R        | pUC   | Amp                      | P <sub>LtetO-1</sub> -CI                                                               | R    | p15A  | Cm                   |
|         | INA3B                         |                              | R        | pUC   | Amp                      | P <sub>LtetO-1</sub> -CI                                                               | RC1  | p15A  | Cm                   |
|         | INA3C                         |                              | R        | pUC   | Amp                      | P <sub>LtetO-1</sub> -CI                                                               | RC2  | p15A  | Cm                   |
|         | INA3D                         |                              | R        | pUC   | Amp                      | P <sub>LtetO-1</sub> -CI                                                               | RC3  | p15A  | Cm                   |
|         | INA4                          | P <sub>INA4</sub> -EGFP      | R        | pUC   | Amp                      | P <sub>LtetO-1</sub> -CI                                                               | R    | p15A  | Cm                   |
|         | INA5A                         | P <sub>INA5</sub> -EGFP      | R        | ColE1 | Amp                      | P <sub>LtetO-1</sub> -CI                                                               | RC1  | p15A  | Cm                   |
|         | INA5B                         |                              | R        | ColE1 | Amp                      | P <sub>LtetO-1</sub> -CI                                                               | RC2  | p15A  | Cm                   |
|         | INA5C                         |                              | R        | ColE1 | Amp                      | P <sub>LtetO-1</sub> -CI                                                               | RC3  | p15A  | Cm                   |
|         | INA6A                         | P <sub>INA6</sub> -EGFP      | R        | ColE1 | Amp                      | P <sub>LtetO-1</sub> -CI                                                               | RC1  | p15A  | Cm                   |
|         | INA6B                         |                              | R        | ColE1 | Amp                      | P <sub>LtetO-1</sub> -CI                                                               | RC2  | p15A  | Cm                   |
|         | INA6C                         |                              | R        | ColE1 | Amp                      | P <sub>LtetO-1</sub> -CI                                                               | RC3  | p15A  | Cm                   |
| INA7A   | P <sub>INA7</sub> -EGFP       | R                            | ColE1    | Amp   | P <sub>LtetO-1</sub> -CI | RC1                                                                                    | p15A | Cm    |                      |
| INA7B   |                               | R                            | ColE1    | Amp   | P <sub>LtetO-1</sub> -CI | RC2                                                                                    | p15A | Cm    |                      |
| INA7C   |                               | R                            | ColE1    | Amp   | P <sub>LtetO-1</sub> -CI | RC3                                                                                    | p15A | Cm    |                      |
| INA7A.A | P <sub>INA7</sub> -mTFP1      | R                            | ColE1    | Amp   | P <sub>LtetO-1</sub> -CI | RC1                                                                                    | p15A | Cm    |                      |
| BNeu3   | AAH1                          | P <sub>AAH</sub> -EGFP       | RBS<br>H | p15A  | Cm                       | BBa_J23102-LuxR                                                                        | R    | ColE1 | Amp                  |
|         | AAH2                          | P <sub>AAH</sub> -E2-Crimson | RBS<br>H | p15A  | Cm                       | BBa_J23102-LuxR                                                                        | R    | ColE1 | Amp                  |
| BNeu4   | IAH1                          | P <sub>IAH</sub> -EGFP       | R        | p15A  | Cm                       | BBa_J23102-LuxR                                                                        | R    | ColE1 | Amp                  |
|         | IAH2                          | P <sub>IAH</sub> -tdTomato   | R        | p15A  | Cm                       | BBa_J23102-LuxR                                                                        | R    | ColE1 | Amp                  |
| BNeu5   | N1                            | P <sub>R</sub> -EGFP         | R        | p15A  | Cm                       | P <sub>LlacO-1</sub> .Frame-shifted CI*<br>and P <sub>LtetO-1</sub> .Frame-shifted CI* | R    | ColE1 | Amp                  |
|         | N2                            | P <sub>R</sub> -mKO2         | R        | p15A  | Cm                       | P <sub>LlacO-1</sub> .Frame-shifted CI*<br>and P <sub>LtetO-1</sub> .Frame-shifted CI* | R    | ColE1 | Amp                  |
| BNeu6   | ANI1A                         | P <sub>ANI1</sub> -EGFP      | R        | ColE1 | Amp                      | P <sub>LlacO-1</sub> -CI                                                               | R    | p15A  | Cm                   |
|         | ANI1B                         |                              | R        | ColE1 | Amp                      | P <sub>LlacO-1</sub> -CI                                                               | RC1  | p15A  | Cm                   |
|         | ANI1C                         |                              | R        | ColE1 | Amp                      | P <sub>LlacO-1</sub> -CI                                                               | RC2  | p15A  | Cm                   |
|         | ANI1D                         |                              | R        | ColE1 | Amp                      | P <sub>LlacO-1</sub> -CI                                                               | RC3  | p15A  | Cm                   |
|         | ANI2A                         | P <sub>ANI2</sub> -EGFP      | R        | ColE1 | Amp                      | P <sub>LlacO-1</sub> -CI                                                               | R    | p15A  | Cm                   |
|         | ANI2B                         |                              | R        | ColE1 | Amp                      | P <sub>LlacO-1</sub> -CI                                                               | RC1  | p15A  | Cm                   |
|         | ANI2C                         |                              | R        | ColE1 | Amp                      | P <sub>LlacO-1</sub> -CI                                                               | RC2  | p15A  | Cm                   |
|         | ANI2D                         |                              | R        | ColE1 | Amp                      | P <sub>LlacO-1</sub> -CI                                                               | RC3  | p15A  | Cm                   |
|         | ANI3A                         | P <sub>ANI3</sub> -EGFP      | R        | ColE1 | Amp                      | P <sub>LlacO-1</sub> -CI                                                               | R    | p15A  | Cm                   |
|         | ANI3B                         |                              | R        | ColE1 | Amp                      | P <sub>LlacO-1</sub> -CI                                                               | RC1  | p15A  | Cm                   |
|         | ANI3C                         |                              | R        | ColE1 | Amp                      | P <sub>LlacO-1</sub> -CI                                                               | RC2  | p15A  | Cm                   |
|         | ANI3D                         |                              | R        | ColE1 | Amp                      | P <sub>LlacO-1</sub> -CI                                                               | RC3  | p15A  | Cm                   |
|         | ANI4A                         | P <sub>ANI4</sub> EGFP       | R        | ColE1 | Amp                      | P <sub>LlacO-1</sub> -CI                                                               | R    | p15A  | Cm                   |
|         | ANI4B                         |                              | R        | ColE1 | Amp                      | P <sub>LlacO-1</sub> -CI                                                               | RC1  | p15A  | Cm                   |
| ANI4C   | R                             |                              | ColE1    | Amp   | P <sub>LlacO-1</sub> -CI | RC2                                                                                    | p15A | Cm    |                      |
| ANI4D   | R                             |                              | ColE1    | Amp   | P <sub>LlacO-1</sub> -CI | RC3                                                                                    | p15A | Cm    |                      |

|        |         |                                 |   |       |     |                                    |     |       |     |
|--------|---------|---------------------------------|---|-------|-----|------------------------------------|-----|-------|-----|
|        | ANI2C.A | P <sub>ANI2</sub> -E2-Crimson   | R | ColE1 | Amp | P <sub>LacO-1</sub> -CI            | RC2 | p15A  | Cm  |
| BNeu7  | AHLB1   | P <sub>Lux+</sub> -EGFP         | R | p15A  | Cm  | BBa J23102-LuxR                    | R   | CoLE1 | Amp |
|        | AHLB2   | P <sub>Lux+</sub> -E2-Crimson   | R | p15A  | Cm  | BBa J23102-LuxR                    | R   | CoLE1 | Amp |
| BNeu8  | ATCB1   | P <sub>LacO-1</sub> -E2-EGFP    | R | ColE1 | Amp | -                                  | -   | -     | -   |
|        | ATCB2   | P <sub>LacO-1</sub> -E2-Crimson | R | ColE1 | Amp | -                                  | -   | -     | -   |
| BNeu9  | ANH1    | P <sub>ANH</sub> -EGFP          | R | ColE1 | Amp | BBa J23102-LuxR                    | R   | CoLE1 | Amp |
|        |         |                                 |   |       |     | P <sub>Lux</sub> -Frame-shifted CI | R   | p15A  | Cm  |
|        | ANH2    | P <sub>ANH</sub> -tdTomato      | R | ColE1 | Amp | BBa J23102-LuxR                    | R   | CoLE1 | Amp |
|        |         |                                 |   |       |     | P <sub>Lux</sub> -Frame-shifted CI | R   | p15A  | Cm  |
| BNeu10 | INH1    | P <sub>INH</sub> -EGFP          | R | ColE1 | Amp | BBa J23102-LuxR                    | R   | CoLE1 | Amp |
|        |         |                                 |   |       |     | P <sub>Lux</sub> -Frame-shifted CI | R   | p15A  | Cm  |
|        | INH2    | P <sub>INH</sub> -E2-Crimson    | R | ColE1 | Amp | BBa J23102-LuxR                    | R   | CoLE1 | Amp |
|        |         |                                 |   |       |     | P <sub>Lux</sub> -Frame-shifted CI | R   | p15A  | Cm  |

\*Frame-shifted CI is a mutant form of  $\lambda$  repressor CI [Supplementary reference 1].

**Table S3: List of Promoters, primers, oligos and RBSs.** *lacO1*, *tetO2*, Lux box, *OR1* and *OR2* operator sites are colored in red, brown, green, yellow and blue respectively. Transcription start site is shown in bold. -10 and -35 hexamers are underlined. Each promoter is flanked by *XhoI* and *EcoRI* restriction sites (marked in italics).

| Name                          | Sequence (5' – 3')                                                                                                                                                                                                                               | Purpose                                             | Source                      |
|-------------------------------|--------------------------------------------------------------------------------------------------------------------------------------------------------------------------------------------------------------------------------------------------|-----------------------------------------------------|-----------------------------|
| P <sub>I<sub>AA</sub>1</sub>  | <i>CTCGAGTCCCTATCAGTGATAGAGATTGAC</i><br><u>ATTGTGAGCGGATAACAAGATACTGAGCAC</u><br><i>AATTGTGAGCGGATAACAATGAATTC</i>                                                                                                                              | Construction and weight & bias adjustment of BNeu 1 | This study                  |
| P <sub>I<sub>AA</sub>2</sub>  | <i>CTCGAGTCCCTATCAGTGATAGAGATTGAC</i><br><u>CCTATCAGTGATAGAGATTGACATTGTGAG</u><br><i>CGGATAACAAGATACTGAGCAC AATTGTGA</i><br><i>GCGGATAACAATGAATTC</i>                                                                                            |                                                     | This study                  |
| P <sub>I<sub>AA</sub>3</sub>  | <i>CTCGAGAATTGTGAGCGGATAACAATTGAC</i><br><u>ATCCCTATCAGTGATAGAGATACTGAGCAC</u><br><i>ATCCCTATCAGTGATAGAGAGAATTC</i>                                                                                                                              |                                                     | This study                  |
| P <sub>I<sub>AA</sub>4</sub>  | <i>CTCGAGTCCCTATCAGTGATAGAGATTGAC</i><br><u>ATTGTGAGCGGATAACAAGATACTGAGCAC</u><br><i>ATCCCTATCAGTGATAGAGAGAATTC</i>                                                                                                                              |                                                     | This study                  |
| P <sub>I<sub>AA</sub>5</sub>  | <i>CTCGAGTCCCTATCAGTGATAGAGATTGAC</i><br><u>ATCCCTATCAGTGATAGAGATACTGAGCAC</u><br><i>AATTGTGAGCGGATAACAATGAATTC</i>                                                                                                                              |                                                     | This study                  |
| P <sub>I<sub>AA</sub>6</sub>  | <i>CTCGAGTCCCTATCAGTGATAGAGATTGAC</i><br><u>ATTGTGAGCGGATAACAAGATACTGAGCAC</u><br><i>AATTGTGAGCGGATAACAATGATCCCTAT</i><br><i>CAGTGATAGAGAGAATTC</i>                                                                                              |                                                     | This study                  |
| P <sub>I<sub>AA</sub>7</sub>  | <i>CTCGAGTCCCTATCAGTGATAGAGATTGAC</i><br><u>ATTGTGAGCGGATAACAAGATACTGAGCAC</u><br><i>ATCCCTATCAGTGATAGAGAGATAAATTGTG</i><br><i>AGCGGATAACAATGAATTC</i>                                                                                           |                                                     | This study                  |
| P <sub>I<sub>AA</sub>8</sub>  | <i>CTCGAGTCCCTATCAGTGATAGAGATTGAC</i><br><u>ATTGTGAGCGGATAACAAGATACTGAGCAC</u><br><i>ATCCCTATCAGTGATAGAGAGATAAATTGTG</i><br><i>AGCGGATAACAATGATAAATTGTGAGCGGA</i><br><i>TAACAATGAATTC</i>                                                        |                                                     | [Supplementary reference 1] |
| P <sub>I<sub>AA</sub>9</sub>  | <i>CTCGAGTCCCTATCAGTGATAGAGATTGAC</i><br><u>ATTGTGAGCGGATAACAAGATACTGAGCAC</u><br><i>ATCCCTATCAGTGATAGAGAGATAAATTGTG</i><br><i>AGCGGATAACAATGATCCCTATCAGTGA</i><br><i>TAGAGAGAATTC</i>                                                           |                                                     | This study                  |
| P <sub>I<sub>AA</sub>10</sub> | <i>CTCGAGTCCCTATCAGTGATAGAGATTGAC</i><br><u>ATTGTGAGCGGATAACAAGATACTGAGCAC</u><br><i>ATCCCTATCAGTGATAGAGAGATGATAAATT</i><br><i>GTGAGCGGATAACAATGATGATCCCTAT</i><br><i>CAGTGATAGAGAGATGATAAATTGTGAGCGG</i><br><i>ATAACAATGAATTC</i>               |                                                     | This study                  |
| P <sub>I<sub>AA</sub>11</sub> | <i>CTCGAGTCCCTATCAGTGATAGAGATTGAC</i><br><u>ATTGTGAGCGGATAACAAGATACTGAGCAC</u><br><i>ATCCCTATCAGTGATAGAGAGATGATAAATT</i><br><i>GTGAGCGGATAACAATGATGATCCCTAT</i><br><i>CAGTGATAGAGAGATGATAAATTGTGAGCGG</i><br><i>ATAACAATGATGATCCCTATCAGTGATA</i> |                                                     | This study                  |

|                      |                                                                                                               |                                                                                                                                                                                                             |            |
|----------------------|---------------------------------------------------------------------------------------------------------------|-------------------------------------------------------------------------------------------------------------------------------------------------------------------------------------------------------------|------------|
|                      | GAGAGATGATAAATTGTGAGCGGATAACAATTGAATTC                                                                        |                                                                                                                                                                                                             |            |
| P <sub>INA1</sub>    | CCTCGAGTACCTCTGGCGGTGATATTGACATTTGTGAGCGGATAACAAGATACTGAGCACAAATTTGTGAGCGGATAACAATGAATTC                      | Construction and weight & bias adjustment of BNeu 2                                                                                                                                                         | This study |
| P <sub>INA2</sub>    | CTCGAGTACCTCTGGCGGTGATAGATTACCTCTGGCGGTGATATTGACATTTGTGAGCGGATAACAAGATACTGAGCACAAATTTGTGAGCGGATAACAATGAATTC   |                                                                                                                                                                                                             | This study |
| P <sub>INA3</sub>    | CTCGAGTAAACACCGTGCGTGTGACTATTTTACCTCTGGCGGTGATAATGGTTGCAATTGTGAGCGGATAACAATGAATTC                             |                                                                                                                                                                                                             | This study |
| P <sub>INA4</sub>    | CTCGAGTAAACACCGTGCGTGTGACTATTTTACCTCTGGCGGTGATAATGGTTGCAATTGTGAGCGGATAACAATGATAAATTGTGAGCGGATAACAATGAATTC     |                                                                                                                                                                                                             | This study |
| P <sub>INA5</sub>    | CTCGAGAATTGTGAGCGGATAACAATTGACATTGTGAGCGGATAACAAGATACTGAGCACATCTACCTCTGGCGGTGATAGAATTC                        |                                                                                                                                                                                                             | This study |
| P <sub>INA6</sub>    | CTCGAGAATTGTGAGCGGATAACAATTGACATTGTGAGCGGATAACAAGATACTGAGCACATCTACCTCTGGCGGTGATAGATGATTACCTCTGGCGGTGATAGAATTC |                                                                                                                                                                                                             | This study |
| P <sub>INA7</sub>    | CTCGAGAATTGTGAGCGGATAACAATTGACATTGTGAGCGGATAACAAGATACTGAGCACATCTACCTCTGGCGGTGATAGATGATTACCTCTGGCGGTGATAGAATTC |                                                                                                                                                                                                             | This study |
| P <sub>ANI1</sub>    | CTCGAGTACCTCTGGCGGTGATATTGACATCCATCAGTGATAGAGATACTGAGCACATCCATCAGTGATAGAGAGAATTC                              | Construction and weight & bias adjustment of BNeu 6                                                                                                                                                         | This study |
| P <sub>ANI2</sub>    | CCTCGAGTACCTCTGGCGGTGATAGATTACCTCTGGCGGTGATATTGACATCCCTATCAGTGATAGAGATACTGAGCACATCCCTATCAGTGATAGAGAGAATTC     |                                                                                                                                                                                                             | This study |
| P <sub>ANI3</sub>    | CTCGAGTACCTCTGGCGGTGATATTGACATCCATCAGTGATAGAGATACTGAGCACATCTACCTCTGGCGGTGATAGAATTC                            |                                                                                                                                                                                                             | This study |
| P <sub>ANI4</sub>    | CTCGAGTCCCTATCAGTGATAGAGATTGACATACCTCTGGCGGTGATAGATACTGAGCACATCCCTATCAGTGATAGAGAGAATTC                        |                                                                                                                                                                                                             | This study |
| P <sub>AAH</sub>     | CTCGAGACCTGTAGGATCGTACAGGTTTACGTCCCTATCAGTGATAGAGTATAGTCGAATAAATCCCTATCAGTGATAGAGAGAATTC                      | Construction of BNeu 3                                                                                                                                                                                      | This study |
| P <sub>IAH</sub>     | CTCGAGACCTGTAGGATCGTACAGGTTTACGTTTGTGAGCGGATAACAATATAGTCGAATAAATTGTGAGCGGATAACAATTGAATTC                      | Construction of BNeu 4                                                                                                                                                                                      | This study |
| P <sub>R</sub>       | CTCGAGTAAACACCGTGCGTGTGACTATTTTACCTCTGGCGGTGATAATGGTTGCAATTGTGAGCGGATAACAATGAATTC                             | Construction of BNeu 5                                                                                                                                                                                      | [1]        |
| BBa_J23102           | CTCGAGTTGACAGCTAGCTCAGTCCTAGGTACTGTGCTAGCGAATTC                                                               | Construction of BNeus 3, 4, 7, 9 and 10                                                                                                                                                                     | [2]        |
| P <sub>Lux</sub>     | CTCGAGACCTGTAGGATCGTACAGGTTTACGCAAGAAAATGGTTTGTATAGTCGAATAAGAATTC                                             | Construction of BNeus 9 and 10                                                                                                                                                                              | This study |
| P <sub>Lux*</sub>    | CTCGAGACCTGTAGGATCGTACAGGTTTACGCAAGAAAATGGTTTGTACTTTTCGAATAAGAATTC                                            | Construction of BNeu 7                                                                                                                                                                                      | [3]        |
| P <sub>Llet0-1</sub> | CTCGAGTCCCTATCAGTGATAGAGATTGACATCCCTATCAGTGATAGAGATACTGAGCACATCAGCAGGACGCACTGACCGAATTC                        | Construction of BNeus 5 and 8                                                                                                                                                                               | [4]        |
| P <sub>Llac0-1</sub> | CTCGAGAATTGTGAGCGGATAACAATTGACATTGTGAGCGGATAACAAGATACTGAGCACATCAGCAGGACGCACTGACCGAATTC                        | Construction of BNeu 5                                                                                                                                                                                      | [4]        |
| Primer 1             | GCCCTTCGTCTTCACCTC                                                                                            | Amplification of promoters P <sub>IAA1</sub> , P <sub>IAA2</sub> , P <sub>INA1</sub> , P <sub>INA2</sub> , P <sub>ANI1</sub> , P <sub>ANI2</sub> , P <sub>ANI3</sub> and P <sub>ANI4</sub> : forward primer | This study |
| Primer 2             | ATGTTTTTGGCGTCTTCCAT                                                                                          | Amplification of promoters P <sub>IAA1</sub> , P <sub>IAA2</sub> , P <sub>INA1</sub> , P <sub>INA2</sub> , P <sub>ANI1</sub> , P <sub>ANI2</sub> , P <sub>ANI3</sub> and P <sub>ANI4</sub> : reverse primer | This study |

|                  |                                                                                                      |                                                                                                        |            |
|------------------|------------------------------------------------------------------------------------------------------|--------------------------------------------------------------------------------------------------------|------------|
| <b>Primer 3</b>  | CGAGGCCCTTTCGCTTCACCTCGAGAATTG<br>TGAGCGGATAACAATTGACATCCCTATCAG<br>TGATAGAGATACTGAGCACACA           | Amplification of promoter P <sub>IAA3</sub> : forward primer                                           | This study |
| <b>Primer 4</b>  | ATGTTTTTGGCGTCTCCATGGTACCTTTCT<br>CCTCTTAAATGAATTCTCTATCACTGATA<br>GGGATGTGCTCAGTATCTCTATCA          | Amplification of promoter P <sub>IAA3</sub> : reverse primer                                           | This study |
| <b>Primer 5</b>  | CGAGGCCCTTTCGCTTCACCTCGAGTCCCT<br>ATCAGTGATAGAGATTGACATTGTGAGCGG<br>ATAACAAGATACTGAGCACATC           | Amplification of promoter P <sub>IAA4</sub> : forward primer                                           | This study |
| <b>Primer 6</b>  | ATGTTTTTGGCGTCTCCATGGTACCTTTCT<br>CCTCTTAAATGAATTCTCTATCACTGATA<br>GGGATGTGCTCAGTATCTTGT             | Amplification of promoter P <sub>IAA4</sub> : reverse primer                                           | This study |
| <b>Primer 7</b>  | CAATTCTTATGCCGGTGTG                                                                                  | Amplification of promoters P <sub>IAA5</sub> and P <sub>IAA10</sub> : forward primer                   | This study |
| <b>Primer 8</b>  | GTCGAAGATGTTGGGGTGT                                                                                  | Amplification of promoters P <sub>IAA5</sub> and P <sub>IAA10</sub> : reverse primer                   | This study |
| <b>Primer 9</b>  | CAGAATCGTCGATGCAGTGA                                                                                 | Amplification of promoters P <sub>IAA6</sub> and P <sub>IAA11</sub> : forward primer                   | This study |
| <b>Primer 10</b> | TTTTCCGTCATCGTCTTCC                                                                                  | Amplification of promoters P <sub>IAA6</sub> and P <sub>IAA11</sub> : reverse primer                   | This study |
| <b>Primer 11</b> | TTGGCAGAAGCTATGAAACGA                                                                                | Amplification of promoters P <sub>IAA7</sub> , P <sub>INA5</sub> and P <sub>AAH</sub> : forward primer | This study |
| <b>Primer 12</b> | CTTGACTGGCGACGTAATCC                                                                                 | Amplification of promoters P <sub>IAA7</sub> , P <sub>INA5</sub> and P <sub>AAH</sub> : reverse primer | This study |
| <b>Primer 13</b> | GCCCTTTCGCTTCACCTC                                                                                   | Amplification of promoters P <sub>IAA8</sub> and P <sub>IAA9</sub> : forward primer                    | This study |
| <b>Primer 14</b> | CTTGACTGGAATTC AATTGTTATCCGCTCAC<br>AATTATCAATTGTTATCCGCTCAC AATTATC<br>TCTCTACTACTGATAGGGATGTGCTCAG | Amplification of promoter P <sub>IAA8</sub> : reverse primer                                           | This study |
| <b>Primer 15</b> | CTTGACTGGAATTC TCTCTACTACTGATAGG<br>GAATCAATTGTTATCCGCTCAC AATTATCTC<br>TCTACTACTGATAGGGATGTGCTCAG   | Amplification of promoter P <sub>IAA9</sub> : reverse primer                                           | This study |
| <b>Primer 16</b> | CAGATGCACATATCGAGGTGA                                                                                | Amplification of promoters P <sub>INA3</sub> and P <sub>INA6</sub> : forward primer                    | This study |
| <b>Primer 17</b> | GCAACTTTTTGGCGGTTG                                                                                   | Amplification of promoters P <sub>INA3</sub> and P <sub>INA6</sub> : reverse primer                    | This study |
| <b>Primer 20</b> | TGAAGAGATACGCCCTGGTT                                                                                 | Amplification of promoter P <sub>INA4</sub> , P <sub>INA7</sub> and P <sub>IAH</sub> : forward primer  | This study |
| <b>Primer 21</b> | TCTGATTTTTCTGCGTCGAG                                                                                 | Amplification of promoter P <sub>INA4</sub> , P <sub>INA7</sub> and P <sub>IAH</sub> : reverse primer  | This study |
| <b>Primer 22</b> | ATCCGTGCAACTCGAGTTGACAGCTAGCTC<br>AGTCCTAGGTAC                                                       | Amplification of promoter BBa_J23102: forward primer                                                   | This study |
| <b>Primer 23</b> | GTTCAAGACTGAATTCGCTAGCACAGTACC<br>TAGGACTGAGCTAGC                                                    | Amplification of promoter BBa_J23102: reverse primer                                                   | This study |
| <b>Primer 24</b> | CTTCACTCGACTCGAGACCTGTAGGATCGT<br>ACAGGTTTACGCAAGAAAATGG                                             | Amplification of promoters P <sub>Lux</sub> and P <sub>Lux*</sub> : forward primer                     | This study |
| <b>Primer 25</b> | CTGATTATGTGAATTC TTTATTTCGAAAGTAA<br>CAAACCATTTCTTGGCTAAACCTG                                        | Amplification of promoter P <sub>Lux*</sub> : reverse primer                                           | This study |
| <b>Primer 26</b> | GAGACCACAATGGCGTAAT                                                                                  | Amplification of fluorescent protein mTFP1: forward primer (1 <sup>st</sup> round)                     | This study |
| <b>Primer 27</b> | CGTAAACGGTCACCTTGTGTA                                                                                | Amplification of fluorescent protein mTFP1: reverse primer (1 <sup>st</sup> round)                     | This study |
| <b>Primer 28</b> | GTCCAGTCGAGGTACCATGGT GAGCAAGGG<br>CGAGGAGACCACAATGGGCGTAAT                                          | Amplification of fluorescent protein mTFP1: forward primer (2 <sup>nd</sup> round)                     | This study |
| <b>Primer 29</b> | GCTTATGCTCTAGATTACTTGTACAGCTCGT<br>CCATGCCGTCGGTGGAGTTGCGGGCCACGG<br>CGCTCTCGTAAACGGTCACCTTGTGTA     | Amplification of fluorescent protein mTFP1: reverse primer (2 <sup>nd</sup> round)                     | This study |
| <b>Primer 30</b> | CAAGGGCGAGGAGCTGTT                                                                                   | Amplification of fluorescent protein EGFP and mVenus: forward primer (1 <sup>st</sup> round)           | This study |
| <b>Primer 31</b> | CCATGCCGAGAGTGATCC                                                                                   | Amplification of fluorescent protein EGFP and mVenus: reverse primer (1 <sup>st</sup> round)           | This study |
| <b>Primer 32</b> | CTTCACTCGAGGTACCATGGT GAGCAAGGG<br>CGAGGAGCTGTT                                                      | Amplification of fluorescent protein EGFP and mVenus: forward primer (2 <sup>nd</sup> round)           | This study |
| <b>Primer 33</b> | CTGATTATGATCTAGATTACTTGTACAGCTC<br>GTCCATGCCGAGAGTGATCC                                              | Amplification of fluorescent protein EGFP and mVenus: reverse primer (2 <sup>nd</sup> round)           | This study |

|                  |                                                                                  |                                                                                                                                                                            |            |
|------------------|----------------------------------------------------------------------------------|----------------------------------------------------------------------------------------------------------------------------------------------------------------------------|------------|
| <b>Primer 34</b> | TGGTGAGTGTGATTAACCAGAGA                                                          | Amplification of fluorescent protein mKO2: forward primer (1 <sup>st</sup> round)                                                                                          | This study |
| <b>Primer 35</b> | AATGTTGCCTTCGGTTTTCC                                                             | Amplification of fluorescent protein mKO2: reverse primer (1 <sup>st</sup> round)                                                                                          | This study |
| <b>Primer 36</b> | GTCCAGTCGAGGTACCATGGTGTGAT TAAACCAGAGA                                           | Amplification of fluorescent protein mKO2: forward primer (2 <sup>nd</sup> round)                                                                                          | This study |
| <b>Primer 37</b> | GTGATTATGATCTAGATTAGCTATGAGCTA CTGCATCTTACCTGCTCAGTAATGTTGCC TTCGGTTTTCC         | Amplification of fluorescent protein mKO2: reverse primer (2 <sup>nd</sup> round)                                                                                          | This study |
| <b>Primer 38</b> | TGGATAGCACTGAGAACGTCAT                                                           | Amplification of fluorescent protein E2-Crimson: forward primer (1 <sup>st</sup> round)                                                                                    | This study |
| <b>Primer 39</b> | ACCACGGTGTAGTCTCGTT                                                              | Amplification of fluorescent protein E2-Crimson: reverse primer (1 <sup>st</sup> round)                                                                                    | This study |
| <b>Primer 40</b> | GTCCAGTCGAGGTACCATGGATAGCACTGA GAACGTCAT                                         | Amplification of fluorescent protein E2-Crimson: forward primer (2 <sup>nd</sup> round)                                                                                    | This study |
| <b>Primer 41</b> | GATTATGATCTAGActaCTGGAACAGGTGGT GGCGGGCCTCGCGCGCTCGTACTGCTCCA CCACGGTGTAGTCTCGTT | Amplification of fluorescent protein E2-Crimson: reverse primer (2 <sup>nd</sup> round)                                                                                    | This study |
| <b>Primer 42</b> | ATGCCGACGACACATACAGA                                                             | Amplification of LuxR gene: forward primer (1 <sup>st</sup> round)                                                                                                         | This study |
| <b>Primer 43</b> | TGATGCCTGGTCTAGTAGTGA                                                            | Amplification of LuxR gene: reverse primer (1 <sup>st</sup> round)                                                                                                         | This study |
| <b>Primer 44</b> | CTCCGTGGAAGGTACCATGAAAAACATAAA TGCCGACGACACATACAGA                               | Amplification of LuxR gene: forward primer (2 <sup>nd</sup> round)                                                                                                         | This study |
| <b>Primer 45</b> | GTTCAAGACTTCTAGATGATGCCTGGCTCT AGTAGTGA                                          | Amplification of LuxR gene: reverse primer (2 <sup>nd</sup> round)                                                                                                         | This study |
| <b>Primer 46</b> | CGAAAAGTGCCACCTGAC                                                               | Amplification of gene cassette starting with promoters P <sub>LtetO-1</sub> , P <sub>IAA1-2</sub> , P <sub>IAA4-11</sub> and P <sub>ANI4</sub> : forward sequencing primer | This study |
| <b>Primer 47</b> | GTCTGATTGAGAATTCATTTTTGAGGAGTTC GGTACCATGGTGAGCAAGGGCGAGGAGCT GTT                | Incorporation of RC1 upstream of EGFP gene: forward primer                                                                                                                 | This study |
| <b>Primer 48</b> | GTCTGATTGAGAATTCATTCGGGAGGAGTG CCGTACCATGGTGAGCAAGGGCGAGGAGC TGTT                | Incorporation of RC2 upstream of EGFP gene: forward primer                                                                                                                 | This study |
| <b>Primer 49</b> | GTCTGATTGAGAATTCATTCGGGAGGAGTG CCGTACCATGGTGAGCAAGGGCGAGGAGC TGTT                | Incorporation of RC3 upstream of EGFP gene: forward primer                                                                                                                 | This study |
| <b>Primer 50</b> | CTGATTATGTGAATTCATTCGACTATAACAA ACCATTTTCTGCGTAAACCTG                            | Amplification of promoter P <sub>Lux</sub> : reverse primer                                                                                                                | This study |
| <b>Oligo 1</b>   | AATTCATTGGAGAGGAGTCCGGTAC                                                        | RBSH: sense strand oligomer for annealing                                                                                                                                  | This study |
| <b>Oligo 2</b>   | CGGACTCCTCTCCAATG                                                                | RBSH: antisense strand oligomer for annealing                                                                                                                              | This study |

**Table S4: Weights and biases of each cellular device (construct) used for optimizing and improving corresponding unit bactoneuron (BNeu j).**

| Unit bactoneuron | Cellular device | w <sub>jR</sub> | w <sub>jI</sub> | w <sub>jA</sub> | w <sub>jH</sub> | b <sub>jR</sub> | b <sub>jI</sub> | b <sub>jA</sub> | b <sub>jH</sub> | b <sub>j</sub> | S.D. of b <sub>j</sub> |
|------------------|-----------------|-----------------|-----------------|-----------------|-----------------|-----------------|-----------------|-----------------|-----------------|----------------|------------------------|
| BNeu1            | IAA1            | -               | 7.75            | 8.42            | -               | -               | -1.26           | -2.15           | -               | -9.79          | 0.16                   |
|                  | IAA2            | -               | 10.37           | 9.05            | -               | -               | -1.68           | -0.77           | -               | -10.94         | 0.29                   |
|                  | IAA3            | -               | 8.94            | 15.44           | -               | -               | 0.67            | -5              | -               | -14.36         | 0.59                   |
|                  | IAA4            | -               | 6.19            | 11.77           | -               | -               | 0.18            | -5.12           | -               | 11.45          | 0.198                  |
|                  | IAA5            | -               | 7.71            | 12.6            | -               | -               | -1.09           | -6.02           | -               | -13.71         | 0.03                   |
|                  | IAA6            | -               | 7.2             | 7.07            | -               | -               | -0.81           | -0.64           | -               | -7.86          | 0.03                   |
|                  | IAA7A           | -               | 8.5             | 11.73           | -               | -               | -1.73           | -4.52           | -               | -13.24         | 0.31                   |
|                  | IAA7B(10h+6h)   | -               | 9.69            | 12.44           | -               | -               | -2.58           | -5.59           | -               | -15.15         | 0.18                   |
|                  | IAA8            | -               | 8.36            | 11.92           | -               | -               | -1.47           | -4.8            | -               | -13.28         | 0.16                   |
|                  | IAA9            | -               | 7.58            | 12.96           | -               | -               | -1.15           | -6.27           | -               | -13.98         | 0.18                   |
|                  | IAA10           | -               | 8.84            | 15.91           | -               | -               | -1.41           | -8.26           | -               | -17.21         | 0.16                   |
|                  | IAA11           | -               | 9.94            | 12.44           | -               | -               | -1.71           | -3.55           | -               | -13.82         | 0.47                   |
| BNeu2            | IAA7B.A         | -               | 9.69            | 12.44           | -               | -               | -2.58           | -5.59           | -               | -15.15         | 0.18                   |
|                  | IAA7B.B         | -               | 9.69            | 12.44           | -               | -               | -2.58           | -5.59           | -               | -15.15         | 0.18                   |
|                  | INA6A           | -               | 9.59            | -15.32          | -               | -               | -2.49           | 7               | -               | -2.54          | 0.07                   |
|                  | INA6B           | -               | 9.11            | -14.87          | -               | -               | -2.12           | 7               | -               | -2.12          | 0.007                  |

|         |                |   |        |        |        |   |       |       |       |        |      |
|---------|----------------|---|--------|--------|--------|---|-------|-------|-------|--------|------|
|         | INA6C          | - | 9.12   | -15.48 | -      | - | -1.71 | 7.5   | -     | -1.67  | 0.07 |
|         | INA7A          | - | 10.98  | -14.57 | -      | - | -2.68 | 7.8   | -     | -2.93  | 0.35 |
|         | INA7A (10h+6h) | - | 10.8   | -14.89 | -      | - | -3.3  | 7.14  | -     | -3.48  | 0.25 |
|         | INA7B          | - | 9.51   | -14.89 | -      | - | -2.12 | 7.5   | -     | -2.07  | 0.08 |
|         | INA7A.A        | - | 10.8   | -14.89 | -      | - | -3.3  | 7.14  | -     | -3.48  | 0.25 |
| BNeu3   | AAH1(10h+6h)   | - | 0      | 13.16  | 10.93  | - | -     | -4.52 | -2.42 | -15.52 | 0.09 |
|         | AAH2           | - | 0      | 13.16  | 10.93  | - | -     | -4.52 | -2.42 | -15.52 | 0.09 |
| BNeu4   | IAH1(10h+6h)   | - | 10.78  | 0      | 11.98  | - | -2.12 | -     | -3.17 | -14.03 | 0.11 |
|         | IAH2           | - | 10.78  | 0      | 11.98  | - | -2.12 | -     | -3.17 | -14.03 | 0.11 |
| BNeu5   | N1(10h+6h)     | - | -10.03 | -11.65 | -      | - | 3.52  | 3.72  | -     | 3.62   | 0.14 |
|         | N2             | - | -10.03 | -11.65 | -      | - | 3.52  | 3.72  | -     | 3.62   | 0.14 |
| BNeu6   | ANI2C          | - | -15.58 | 12.59  | -      | - | 7.5   | -4.3  | -     | -4.7   | 0.56 |
|         | ANI2C (10h+6h) | - | -16.25 | 13.2   | -      | - | 7.5   | -4.64 | -     | -5.17  | 0.75 |
|         | ANI2C.A        | - | -16.25 | 13.2   | -      | - | 7.5   | -4.64 | -     | -5.17  | 0.75 |
| BNeu7   | AHLB1(10h+6h)  | 0 | 0      | 0      | 10.84  | - | -     | -     | -3.21 | -3.21  | -    |
|         | AHLB2          | 0 | 0      | 0      | 10.84  | - | -     | -     | -3.21 | -3.21  | -    |
| BNeu8   | ATCB1(10h+6h)  | 0 | 0      | 12.17  | 0      | - | -     | -4.85 | -     | -4.85  | -    |
|         | ATCB2          | 0 | 0      | 12.17  | 0      | - | -     | -4.85 | -     | -4.85  | -    |
| BNeu 9  | ANH1(10h+6h)   | - | 0      | 10.00  | -12.94 | - | -     | -3.2  | 5.8   | -3.7   | 0.71 |
|         | ANH2           | - | 0      | 10.00  | -12.94 | - | -     | -3.2  | 5.8   | -3.7   | 0.71 |
| BNeu 10 | INH1(10h+6h)   | - | 9.42   | 0      | -13.75 | - | -1.83 | -     | 7.00  | -2.13  | 0.42 |
|         | INH2           | - | 9.42   | 0      | -13.75 | - | -1.83 | -     | 7.00  | -2.13  | 0.42 |

**Table S5: Leakage of each EGFP-expressing cellular device (construct) during weight and bias optimization of unit bactoneurons.**

| Unit bactoneuron | Cellular device    | Promoter expressing Output EGFP | Total leakage ( $\Sigma L$ ) | Highest leakage ( $L_{max}$ ) | Percentage highest leakage ( $L_{max}(\%)$ ) | Difference between total leakage and highest leakage ( $\Sigma L - L_{max}$ ) | Percentage difference between total leakage and highest leakage ( $\frac{\Sigma L - L_{max}}{L_{max}}(\%)$ ) | Fold Change between highest signal and highest leakage |
|------------------|--------------------|---------------------------------|------------------------------|-------------------------------|----------------------------------------------|-------------------------------------------------------------------------------|--------------------------------------------------------------------------------------------------------------|--------------------------------------------------------|
| BNeu 1           | IAA1               | P <sub>IAA1</sub>               | 0.44075                      | 0.27818                       | 27.82                                        | 0.16257                                                                       | 16.26                                                                                                        | 3.59                                                   |
|                  | IAA2               | P <sub>IAA2</sub>               | 0.38592                      | 0.26795                       | 26.8                                         | 0.11797                                                                       | 11.8                                                                                                         | 3.73                                                   |
|                  | IAA3               | P <sub>IAA3</sub>               | 0.26577                      | 0.23858                       | 23.86                                        | 0.02719                                                                       | 2.72                                                                                                         | 4.19                                                   |
|                  | IAA4               | P <sub>IAA4</sub>               | 0.2465                       | 0.23556                       | 23.56                                        | 0.01094                                                                       | 1.09                                                                                                         | 4.25                                                   |
|                  | IAA5               | P <sub>IAA5</sub>               | 0.22367                      | 0.17495                       | 17.5                                         | 0.04872                                                                       | 4.87                                                                                                         | 5.72                                                   |
|                  | IAA6               | P <sub>IAA6</sub>               | 0.42029                      | 0.26436                       | 26.44                                        | 0.15593                                                                       | 15.59                                                                                                        | 3.78                                                   |
|                  | IAA7A              | P <sub>IAA7</sub>               | 0.12599                      | 0.11025                       | 11.03                                        | 0.01574                                                                       | 1.57                                                                                                         | 9.07                                                   |
|                  | IAA7B              |                                 | 0.0724                       | 0.06992                       | 6.99                                         | 0.00248                                                                       | 0.25                                                                                                         | 14.3                                                   |
|                  | IAA8               | P <sub>IAA8</sub>               | 0.11287                      | 0.09674                       | 9.67                                         | 0.01613                                                                       | 1.61                                                                                                         | 10.33                                                  |
|                  | IAA9               | P <sub>IAA9</sub>               | 0.15845                      | 0.13822                       | 13.82                                        | 0.02023                                                                       | 2.02                                                                                                         | 7.23                                                   |
|                  | IAA10              | P <sub>IAA10</sub>              | 0.23014                      | 0.21021                       | 21.02                                        | 0.01993                                                                       | 1.99                                                                                                         | 4.76                                                   |
| IAA11            | P <sub>IAA11</sub> | 0.52619                         | 0.49162                      | 49.16                         | 0.03457                                      | 3.46                                                                          | 2.03                                                                                                         |                                                        |
| BNeu 2           | INA1A              | P <sub>INA1</sub>               | 0.63673                      | 0.28273                       | 28.27                                        | 0.354                                                                         | 35.4                                                                                                         | 3.54                                                   |
|                  | INA1B              |                                 | 0.53862                      | 0.36044                       | 36.04                                        | 0.17819                                                                       | 17.82                                                                                                        | 2.77                                                   |
|                  | INA1C              |                                 | 0.74802                      | 0.45623                       | 45.62                                        | 0.29179                                                                       | 29.18                                                                                                        | 2.19                                                   |
|                  | INA1D              |                                 | 0.80989                      | 0.45047                       | 45.05                                        | 0.35942                                                                       | 35.94                                                                                                        | 2.22                                                   |
|                  | INA2A              | P <sub>INA2</sub>               | 0.72654                      | 0.37157                       | 37.16                                        | 0.35497                                                                       | 35.5                                                                                                         | 2.69                                                   |
|                  | INA2B              |                                 | 0.63688                      | 0.53902                       | 53.9                                         | 0.09787                                                                       | 9.79                                                                                                         | 1.86                                                   |
|                  | INA2C              |                                 | 0.79001                      | 0.51294                       | 51.29                                        | 0.27707                                                                       | 27.71                                                                                                        | 1.95                                                   |
|                  | INA2D              |                                 | 0.85405                      | 0.4802                        | 48.02                                        | 0.37385                                                                       | 37.39                                                                                                        | 2.08                                                   |
|                  | INA3A              | P <sub>INA3</sub>               | 0.77393                      | 0.38146                       | 38.15                                        | 0.39247                                                                       | 39.25                                                                                                        | 2.62                                                   |
|                  | INA3B              |                                 | 0.72405                      | 0.70337                       | 70.34                                        | 0.02067                                                                       | 2.07                                                                                                         | 1.42                                                   |
|                  | INA3C              |                                 | 0.89997                      | 0.80164                       | 80.16                                        | 0.09832                                                                       | 9.83                                                                                                         | 1.25                                                   |
|                  | INA3D              |                                 | 2.13488                      | 0.8703                        | 87.03                                        | 1.26457                                                                       | 126.46                                                                                                       | 1.15                                                   |
|                  | INA4               | P <sub>INA4</sub>               | 1.23277                      | 0.80884                       | 80.88                                        | 0.42393                                                                       | 42.39                                                                                                        | 1.24                                                   |
|                  | INA5A              | P <sub>INA5</sub>               | 0.40655                      | 0.23903                       | 23.9                                         | 0.16752                                                                       | 16.75                                                                                                        | 4.18                                                   |
|                  | INA5B              |                                 | 0.35622                      | 0.23112                       | 23.11                                        | 0.1251                                                                        | 12.51                                                                                                        | 4.33                                                   |
|                  | INA5C              |                                 | 0.56242                      | 0.38104                       | 38.1                                         | 0.18138                                                                       | 18.14                                                                                                        | 2.62                                                   |
|                  | INA6A              |                                 | 0.10504                      | 0.06611                       | 6.61                                         | 0.03893                                                                       | 3.89                                                                                                         | 15.13                                                  |
|                  | INA6B              | P <sub>INA6</sub>               | 0.0933                       | 0.06478                       | 6.48                                         | 0.02852                                                                       | 2.85                                                                                                         | 15.44                                                  |

|         |       |               |          |          |        |          |        |        |
|---------|-------|---------------|----------|----------|--------|----------|--------|--------|
|         | INA6C | $P_{INA7}$    | 0.16935  | 0.08823  | 8.82   | 0.08112  | 8.11   | 11.33  |
|         | INA7A |               | 0.07783  | 0.04258  | 4.26   | 0.03525  | 3.53   | 23.49  |
|         | INA7B |               | 0.09163  | 0.04595  | 4.6    | 0.04567  | 4.57   | 21.76  |
|         | INA7C |               | 0.40418  | 0.34627  | 34.63  | 0.05791  | 5.79   | 2.89   |
| BNeu 3  | AAH1  | $P_{AAH}$     | 0.05393  | 0.0502   | 5.02   | 0.00373  | 0.37   | 19.92  |
| BNeu 4  | IAH1  | $P_{IAH}$     | 0.1402   | 0.08861  | 8.86   | 0.05159  | 5.16   | 11.29  |
| BNeu 5  | N1    | $P_R$         | ~0.00000 | ~0.00000 | ~00.00 | ~0.00000 | ~00.00 | -      |
| BNeu 6  | ANI1A | $P_{ANI1}$    | 0.90311  | 0.74394  | 74.39  | 0.15917  | 15.92  | 1.34   |
|         | ANI1B |               | 0.20376  | 0.17735  | 17.73  | 0.02642  | 2.64   | 5.64   |
|         | ANI1C |               | 0.2262   | 0.20363  | 20.36  | 0.02256  | 2.26   | 4.91   |
|         | ANI1D |               | 0.63651  | 0.62022  | 62.02  | 0.01629  | 1.63   | 1.61   |
|         | ANI2A | $P_{ANI2}$    | 0.60315  | 0.40034  | 40.03  | 0.20281  | 20.28  | 2.5    |
|         | ANI2B |               | 0.22933  | 0.17476  | 17.48  | 0.05457  | 5.46   | 5.72   |
|         | ANI2C |               | 0.15726  | 0.10908  | 10.91  | 0.04818  | 4.82   | 9.16   |
|         | ANI2D |               | 0.26405  | 0.23224  | 23.22  | 0.03181  | 3.18   | 4.31   |
|         | ANI3A | $P_{ANI3}$    | 3.1181   | 2.43408  | 243.41 | 0.68398  | 68.4   | 0.41   |
|         | ANI3B |               | 0.51524  | 0.3359   | 33.59  | 0.17933  | 17.93  | 2.98   |
|         | ANI3C |               | 0.44074  | 0.22444  | 22.44  | 0.21629  | 21.63  | 4.46   |
|         | ANI3D |               | 0.40381  | 0.30815  | 30.82  | 0.09566  | 9.57   | 3.25   |
|         | ANI4A | $P_{ANI4}$    | 0.7652   | 0.47934  | 47.93  | 0.28586  | 28.59  | 2.09   |
|         | ANI4B |               | 0.18267  | 0.16603  | 16.6   | 0.01664  | 1.66   | 6.02   |
|         | ANI4C |               | 0.25445  | 0.23556  | 23.56  | 0.0189   | 1.89   | 4.25   |
|         | ANI4D |               | 0.60619  | 0.59089  | 59.09  | 0.0153   | 1.53   | 1.69   |
| BNeu 7  | AHLB1 | $P_{Lux}^*$   | 0.0338   | 0.0338   | 3.38   | -        | -      | 29.59  |
| BNeu 8  | ATCB1 | $P_{LietO-1}$ | 0.00778  | 0.00778  | 0.78   | -        | -      | 128.53 |
| BNeu 9  | ANH1  | $P_{ANI2}$    | 0.13249  | 0.08548  | 8.55   | 0.04701  | 4.7    | 11.7   |
| BNeu 10 | INH1  | $P_{INA7}$    | 0.17488  | 0.09012  | 9.01   | 0.08476  | 8.48   | 11.1   |

**Table S6: Translation initiation rate calculated from RBS calculator [5].**

| Name of RBS      | Operating Promoter          | Protein of Translational regulation | Translation initiation rate (a.u.) | Sequence (5' – 3')           |
|------------------|-----------------------------|-------------------------------------|------------------------------------|------------------------------|
| R(BBa_B0034) [6] | $P_{LlacO-1} / P_{LietO-1}$ | CI                                  | 40767                              | GAATTCATTAAGAGGAGAAAAGGTACC  |
| RC1              | $P_{LlacO-1} / P_{LietO-1}$ | CI                                  | 2091                               | GAATTCATTTTGGAGGAGTCCGGTACC  |
| RC2              | $P_{LlacO-1} / P_{LietO-1}$ | CI                                  | 518                                | GAATTCATTCGGGAGGAGTGCGGTACC  |
| RC3              | $P_{LlacO-1} / P_{LietO-1}$ | CI                                  | 396                                | GAATTCATTTCCGGAGGAGTGCGGTACC |
| R(BBa_B0034) [6] | $P_{AAH}$                   | EGFP                                | 46                                 | GAATTCATTAAGAGGAGAAAAGGTACC  |
| RH               | $P_{AAH}$                   | EGFP                                | 10                                 | GAATTCATTGGAGAGGAGTCCGGTACC  |

**Table S7: Details of molecular engineering performed for weight and bias optimization of the unit bactoneurons.**

| Unit bactoneuron | Molecular engineering of the cellular devices for weight and bias optimization                                                                                                                                                                                                                                                                                                                                                                                                                                                                                                                                                                                                                                                                                                                                                                                                                                                                                                                                                                                                                                                                                                                                                                                                                                                                                                                                                                                                                                                                                                                                                                                                        |
|------------------|---------------------------------------------------------------------------------------------------------------------------------------------------------------------------------------------------------------------------------------------------------------------------------------------------------------------------------------------------------------------------------------------------------------------------------------------------------------------------------------------------------------------------------------------------------------------------------------------------------------------------------------------------------------------------------------------------------------------------------------------------------------------------------------------------------------------------------------------------------------------------------------------------------------------------------------------------------------------------------------------------------------------------------------------------------------------------------------------------------------------------------------------------------------------------------------------------------------------------------------------------------------------------------------------------------------------------------------------------------------------------------------------------------------------------------------------------------------------------------------------------------------------------------------------------------------------------------------------------------------------------------------------------------------------------------------|
| BNeu 1           | <p><b>Initial assumptions:</b> We took the design knowledge from two reported synthetic promoters showing nonlinear behavior with respect to IPTG and aTc [4] to make a starting set (Set 1) of five synthetic promoters <math>P_{IAA1-5}</math> carried by cellular devices IAA1-5. The designs of those synthetic promoters were made by varying the number and relative positions of the operator sites for LacI and TetR. Schematic representation of the promoter maps can be found in figure 3 and the promoter sequences are shown in supplementary table S3.</p> <p><b>Initial characterization of cellular devices IAA1-5:</b> •No device was found showing <math>\geq 8</math> fold between highest signal and highest leakage (Table S5)<br/>•Either weight values were low, or the difference between IPTG weight and aTc weight was high (Table S4)</p> <p>In most cases, IPTG weight had lower value than aTc weight (Table S4). The weight values represent the slope in the dose response curve (See equation 1 in the main text). Among those five devices, total leakage for IAA4 and IAA5 was similar (Table S5). However, although IAA5 showed lowest value of highest leakage, IAA4 showed minimum leakage associated with the input states other than the highest leakage state (Difference between <math>\sum L</math> and <math>\sum L_{max}</math>). Therefore, we selected IAA4 as the design template for the next set of cellular devices (Set 2) in order to decrease the leakage and sharpen the slope (weight value) of the bactoneural response curve with respect to the input inducers which was the optimization of the weights of the inputs.</p> |



|        |                                                                                                                                                                                                                                                                                                                                                                                                                                                                                                                                                                                                                                                                                                                                                                                                                                                                                                                                                                                                                                                                                                                                                                                                                                                                                                                                                                                                                                                                                                                                                                                                                                                                                                                                                                                                                                                                                                                                                                                                                                                                                                                                                                                                                                                                                                                                                                                                                                                                                                                                                                                                                                                                                                                                                                                                                                                                                                                                                                                                                                                                                                                                                                                                                                                                                                                                                                                                                                                  |
|--------|--------------------------------------------------------------------------------------------------------------------------------------------------------------------------------------------------------------------------------------------------------------------------------------------------------------------------------------------------------------------------------------------------------------------------------------------------------------------------------------------------------------------------------------------------------------------------------------------------------------------------------------------------------------------------------------------------------------------------------------------------------------------------------------------------------------------------------------------------------------------------------------------------------------------------------------------------------------------------------------------------------------------------------------------------------------------------------------------------------------------------------------------------------------------------------------------------------------------------------------------------------------------------------------------------------------------------------------------------------------------------------------------------------------------------------------------------------------------------------------------------------------------------------------------------------------------------------------------------------------------------------------------------------------------------------------------------------------------------------------------------------------------------------------------------------------------------------------------------------------------------------------------------------------------------------------------------------------------------------------------------------------------------------------------------------------------------------------------------------------------------------------------------------------------------------------------------------------------------------------------------------------------------------------------------------------------------------------------------------------------------------------------------------------------------------------------------------------------------------------------------------------------------------------------------------------------------------------------------------------------------------------------------------------------------------------------------------------------------------------------------------------------------------------------------------------------------------------------------------------------------------------------------------------------------------------------------------------------------------------------------------------------------------------------------------------------------------------------------------------------------------------------------------------------------------------------------------------------------------------------------------------------------------------------------------------------------------------------------------------------------------------------------------------------------------------------------|
|        | <p style="text-align: center;">↓ Weight and leakage adjustment step 1 to decrease the leakage and sharpen the slope of the bactoneural response curve</p> <p>The aTc single induction state was the highest leakage state of IAA4 (Figure 3, figure S2 and table S5). Thus, we assumed that, the device produced leakage due to insufficient interactions between LacI transcription factor and its operator sites present in the promoter <math>P_{IAA4}</math> which was supposed to remain turned off because of the LacI binding in aTc single induction condition. Based on this assumption, we increased the number of binding sites with different combinations and relative positions to generate two more promoters <math>P_{IAA6}</math> and 7 carried by cellular devices IAA6 and IAA7A respectively (Figure 3, table S2 and table S3). Increased number of operator sites would promote more LacI binding events causing tight repression of the promoter and therefore leakage reduction. It was previously reported that, the slope of the circuit response curve with respect to the input could be altered by changing the number and the relative positions of the transcription factor-specific operator sites in the target promoter design [7]. Here we thought that the same could be applicable to make the device more sensitive to the input inducers that in turn could sharpen the bactoneural response curve leading to the elevated weight values.</p> <p><b>Initial characterization of cellular devices IAA6 and IAA7A:</b></p> <ul style="list-style-type: none"> <li>•More than 8 fold between highest signal and highest leakage was achieved only for IAA7A (Table S5)</li> <li>•Value of IPTG weight was increased for IAA7A (Table S4)</li> </ul> <p>Hence, we selected IAA7A as the best design form Set 2. We thought to further optimize weights and bias for this bactoneuron (Set 3).</p> <p style="text-align: center;">↓ Weight and leakage adjustment step 2</p> <div style="display: flex; justify-content: space-around;"> <div style="width: 45%;"> <p>We again increased the operator sites and designed promoters <math>P_{IAA8-11}</math> carried by cellular devices IAA8-11 respectively (Figure 3, table S2 and table S3).</p> <p><b>Initial characterization of cellular devices IAA8-11:</b></p> <ul style="list-style-type: none"> <li>•Leakage built up gradually (Table S5)</li> </ul> <p style="text-align: center;">↓</p> <p>No device was selected. We stopped increasing the number of operator sites on the synthetic promoters.</p> </div> <div style="width: 45%;"> <p>We changed the copy number of the plasmid carrying cellular device IAA7A from high copy (pUC) to low copy (p15A) to alter the relative amount of the promoter and its transcription factor per cell resulting in IAA7B (Figure 3 and table S2).</p> <p><b>Initial characterization of cellular device IAA7B:</b></p> <ul style="list-style-type: none"> <li>•Highest fold change between highest signal and highest leakage (Table S5)</li> <li>•Lowest leakage (Table S4)</li> </ul> <p style="text-align: center;">↓</p> <p style="text-align: center;">Selected as the final cellular device</p> </div> </div> <p>Cellular devices IAA7B.A and IAA7B.B: Developed from IAA7B by changing the output from EGFP to E2-Crimson and mVenus respectively (Table S2) only for microscopic experiments.</p> |
| BNeu 2 | <p><b>Initial assumptions:</b> Based on the design knowledge of BNeu 1 and the map of the <math>P_R</math>-<math>P_{RM}</math> promoter system of <math>\lambda</math> phage regulated by CI, four initial designs of the output-expressing synthetic promoters <math>P_{INA1-4}</math> were created by varying number and relative positions of operator sites for LacI and CI (Figure 3 and table S3). They were placed under low copy origin (p15A) while their regulator CI was placed under high copy origin (pUC). CI shows high basal level expression (CI expression from inducible promoter even in absence of the corresponding input inducer) under a strong RBS [Supplementary reference 1] that would affect the desired bactoneural behavior. Therefore, to reduce its basal level expression through reduction of its translation rate, three weak RBSs RC1-3 were designed (Table S3). Individual weak RBSs along with the native strong RBS R (BBa_B0034) were co-transformed with each of the <math>P_{INA1-3}</math> promoters, whereas, for <math>P_{INA4}</math> promoter, only RBS R was tested (Table S2). As a result, in set 1, 13 cellular devices were built (INA1A-D, INA2A-D, INA3A-D and INA4).</p> <p><b>Initial characterization of cellular devices INA1A-4: (Double-cassette systems)</b></p> <ul style="list-style-type: none"> <li>•Fold change between highest signal and highest leakage was very low (~1.1-3.5 fold) for all designs (Table S5)</li> <li>•High leakage accumulation was observed in all cases (Table S5)</li> </ul> <p>We didn't choose any device from set 1 as no one fulfilled our first selection criterion that is at least 8 fold changes between the highest signal and the highest leakage. We decided to create completely new promoter designs.</p>                                                                                                                                                                                                                                                                                                                                                                                                                                                                                                                                                                                                                                                                                                                                                                                                                                                                                                                                                                                                                                                                                                                                                                                                                                                                                                                                                                                                                                                                                                                                                                                                                             |

|        |                                                                                                                                                                                                                                                                                                                                                                                                                                                                                                                                                                                                                                                                                                                                                                                                                                                                                                                                                                                                                                                                                                                                                             |
|--------|-------------------------------------------------------------------------------------------------------------------------------------------------------------------------------------------------------------------------------------------------------------------------------------------------------------------------------------------------------------------------------------------------------------------------------------------------------------------------------------------------------------------------------------------------------------------------------------------------------------------------------------------------------------------------------------------------------------------------------------------------------------------------------------------------------------------------------------------------------------------------------------------------------------------------------------------------------------------------------------------------------------------------------------------------------------------------------------------------------------------------------------------------------------|
|        | <p style="text-align: center;">↓<br/>Weight and leakage adjustment step 1</p> <p>Next, we made another set (Set 2) of synthetic promoters <math>P_{INA5-7}</math> (Table S3) by varying the number and relative positions of the LacI and CI binding sites. Here also, we placed CI under weak RBSs RC1-3 but we didn't consider strong RBS R anymore (Figure 3). We also changed the plasmid copy number for CI from high copy (pUC ori) to medium copy (ColE1 ori). In this way 9 more device designs were generated (INA5A-C, INA6A-C and INA7A-C).</p> <p><b>Initial characterization of cellular devices INA5A-7C:</b></p> <ul style="list-style-type: none"> <li>•INA7A showed highest fold change between highest signal and highest leakage (~23.5 fold; Table S5)</li> <li>•INA7A showed good weight values compared to cellular device IAA7B for BNeu 1 (Table S4)</li> </ul> <p style="text-align: center;">↓</p> <p style="text-align: center;">INA7A was selected as the final cellular device</p> <p>Cellular device INA7A.A: Developed from INA7A by changing the output from EGFP to mTFP1 (Table S2) only for microscopic experiments.</p> |
| BNeu 3 | <p><b>Initial assumptions:</b> Based on the design knowledge of BNeu 1, the map of the bacterial <math>P_{LUX}</math> promoter (Table S3) regulated by LuxR, and the design of a reported synthetic promoter-based system showing nonlinear behavior with respect to IPTG, aTc and AHL [2], the design of the output-expressing synthetic promoter <math>P_{AAH}</math> was created (Figure S4 and table S3).</p> <p><b>Initial characterization of cellular device AAH1: (Double-cassette system)</b></p> <ul style="list-style-type: none"> <li>•Total leakage was low (Table S5)</li> <li>•Difference between total leakage and highest leakage was Low (Table S5)</li> <li>•Fold change between highest signal and highest leakage was more than 8 fold (Table S5)</li> <li>•Good weight values as compared to other bactoneurons (Table S4)</li> </ul> <p style="text-align: center;">↓</p> <p style="text-align: center;">Selected as the final cellular device</p> <p>Cellular device AAH2: Developed from AAH1 by changing the output from EGFP to E2-Crimson (Table S2) only for microscopic experiments.</p>                                      |
| BNeu 4 | <p><b>Initial assumptions:</b> Based on the design knowledge of BNeu 1 and BNeu 2, the map of the bacterial <math>P_{LUX}</math> promoter (Table S3) regulated by LuxR, and the design of a reported synthetic promoter-based system showing nonlinear behavior with respect to IPTG, aTc and AHL [2], the design of the output-expressing synthetic promoter <math>P_{IAH}</math> was created (Figure S4 and table S3).</p> <p><b>Initial characterization of cellular device IAH1: (Double-cassette system)</b></p> <ul style="list-style-type: none"> <li>•Total leakage was low (Table S5)</li> <li>•Difference between total leakage and highest leakage was Low (Table S5)</li> <li>•Fold change between highest signal and highest leakage was more than 8 fold (Table S5)</li> <li>•Good weight values as compared to other bactoneurons (Table S4)</li> </ul> <p style="text-align: center;">↓</p> <p style="text-align: center;">Selected as the final cellular device</p> <p>Cellular device IAH2: Developed from IAH1 by changing the output from EGFP to tdTomato (Table S2) only for microscopic experiments.</p>                             |
| BNeu 5 | <p><b>Initial assumptions:</b> Based on a biological NOT gate, developed previously [1], cellular device N1 was designed.</p> <p><b>Initial characterization of cellular device N1: (Double-cassette system)</b></p> <ul style="list-style-type: none"> <li>•Total leakage was low (Table S5)</li> <li>•Difference between total leakage and highest leakage was low (Table S5)</li> <li>•Fold change between highest signal and highest leakage was more than 8 fold (Table S5)</li> <li>•Good weight values as compared to other bactoneurons (Table S4)</li> </ul>                                                                                                                                                                                                                                                                                                                                                                                                                                                                                                                                                                                       |

|        |                                                                                                                                                                                                                                                                                                                                                                                                                                                                                                                                                                                                                                                                                                                                                                                                                                                                                                                                                                                                                                                                                                                                                                                                                                                                                             |
|--------|---------------------------------------------------------------------------------------------------------------------------------------------------------------------------------------------------------------------------------------------------------------------------------------------------------------------------------------------------------------------------------------------------------------------------------------------------------------------------------------------------------------------------------------------------------------------------------------------------------------------------------------------------------------------------------------------------------------------------------------------------------------------------------------------------------------------------------------------------------------------------------------------------------------------------------------------------------------------------------------------------------------------------------------------------------------------------------------------------------------------------------------------------------------------------------------------------------------------------------------------------------------------------------------------|
|        | <p style="text-align: center;">↓</p> <p style="text-align: center;">Selected as the final cellular device</p> <p>Cellular device N2: Developed from N1 by changing the output from EGFP to mKO2 (Table S2) only for microscopic experiments.</p>                                                                                                                                                                                                                                                                                                                                                                                                                                                                                                                                                                                                                                                                                                                                                                                                                                                                                                                                                                                                                                            |
| BNeu 6 | <p><b>Initial assumptions:</b> Based on the design knowledge of BNeu 1 and BNeu 2, four initial designs of the output-expressing synthetic promoters <math>P_{ANI1-4}</math> were made by varying number and relative positions of operator sites for TetR and CI (Figure 3 and table S3). They were placed under low copy origin (p15A) while their regulator CI was placed under medium copy origin (ColE1). Similar to the bacteriophage BNeu 2, weak RBSs RC1-3 along with the native RBS R (BBa_B0034) were co-transformed with each of the <math>P_{ANI1-4}</math> promoters resulting in a set (Set 1) of 12 designs (ANI1A-D, ANI2A-D, ANI3A-D and ANI4A-D).</p> <p><b>Initial characterization of cellular devices ANI1A-4D: (Double-cassette systems)</b></p> <ul style="list-style-type: none"> <li>• Only ANI2C showed more than 8 fold change between highest signal and highest leakage (Table S5)</li> <li>• ANI2C showed good weight values compared to other bacteriophages (Table S4)</li> </ul> <p style="text-align: center;">↓</p> <p style="text-align: center;">ANI2C was selected as the final cellular device</p> <p>Cellular device ANI2C.A: Developed from ANI2C by changing the output from EGFP to E2-Crimson (Table S2) only for microscopic experiments.</p> |
| BNeu 7 | <p><b>Initial assumptions:</b> Based on the design knowledge of BNeu 3 and BNeu 4, cellular device AHLB1 was designed (Figure S4 and table S2).</p> <p><b>Initial characterization of cellular device AHLB1: (Double-cassette system)</b></p> <ul style="list-style-type: none"> <li>• Total leakage was low (Table S5)</li> <li>• Difference between total leakage and highest leakage was Low (Table S5)</li> <li>• Fold change between highest signal and highest leakage was more than 8 fold (Table S5)</li> <li>• Good weight value as compared to other bacteriophages (Table S4)</li> </ul> <p style="text-align: center;">↓</p> <p style="text-align: center;">Selected as the final cellular device</p> <p>Cellular device AHLB2: Developed from AHLB1 by changing the output from EGFP to E2-Crimson (Table S2) only for microscopic experiments.</p>                                                                                                                                                                                                                                                                                                                                                                                                                            |
| BNeu 8 | <p><b>Initial assumptions:</b> Based on the design knowledge of the reported synthetic promoter <math>P_{LtetO-1}</math> showing nonlinear behavior with respect to aTc [4], cellular device ATCB1 was designed (Figure S4 and table S2).</p> <p><b>Initial characterization of cellular device ATCB1: (Single-cassette system in medium copy (ColE1 ori) plasmid)</b></p> <ul style="list-style-type: none"> <li>• Total leakage was low (Table S5)</li> <li>• Difference between total leakage and highest leakage was low (Table S5)</li> <li>• Fold change between highest signal and highest leakage was more than 8 fold (Table S5)</li> <li>• Good weight value as compared to other bacteriophages (Table S4)</li> </ul> <p style="text-align: center;">↓</p> <p style="text-align: center;">Selected as the final cellular device</p> <p>Cellular device ATCB2: Developed from ATCB1 by changing the output from EGFP to E2-Crimson (Table S2) only for microscopic experiments.</p>                                                                                                                                                                                                                                                                                               |
| BNeu 9 | <p><b>Initial assumptions:</b> Based on the design knowledge of BNeu 3, BNeu 6 and BNeu 7, cellular device ANH1 was designed (Figure S4 and table S2).</p> <p><b>Initial characterization of cellular device ANH1: (Double-cassette system)</b></p> <ul style="list-style-type: none"> <li>• Total leakage was low (Table S5)</li> <li>• Difference between total leakage and highest leakage was Low (Table S5)</li> <li>• Fold change between highest signal and highest leakage</li> </ul>                                                                                                                                                                                                                                                                                                                                                                                                                                                                                                                                                                                                                                                                                                                                                                                               |

|         |                                                                                                                                                                                                                                                                                                                                                                                                                                                                                                                                                                                                                                                                                                                                                                                                             |
|---------|-------------------------------------------------------------------------------------------------------------------------------------------------------------------------------------------------------------------------------------------------------------------------------------------------------------------------------------------------------------------------------------------------------------------------------------------------------------------------------------------------------------------------------------------------------------------------------------------------------------------------------------------------------------------------------------------------------------------------------------------------------------------------------------------------------------|
|         | <p>was more than 8 fold (Table S5)</p> <p>• Good weight values as compared to other bactoneurons (Table S4)</p> <p>↓</p> <p>Selected as the final cellular device</p> <p>Cellular device ANH2: Developed from ANH1 by changing the output from EGFP to tdTomato (Table S2) only for microscopic experiments.</p>                                                                                                                                                                                                                                                                                                                                                                                                                                                                                            |
| BNeu 10 | <p><b>Initial assumptions:</b> Based on the design knowledge of BNeu 2, BNeu 4 and BNeu 7, cellular device INH1 was designed (Figure S4 and table S2).</p> <p><b>Initial characterization of cellular device INH1: (Double-cassette system)</b></p> <ul style="list-style-type: none"> <li>• Total leakage was low (Table S5)</li> <li>• Difference between total leakage and highest leakage was Low (Table S5)</li> <li>• Fold change between highest signal and highest leakage was more than 8 fold (Table S5)</li> <li>• Good weight values as compared to other bactoneurons (Table S4)</li> </ul> <p>↓</p> <p>Selected as the final cellular device</p> <p>Cellular device INH2: Developed from INH1 by changing the output from EGFP to E2-Crimson (Table S2) only for microscopic experiments.</p> |

**Table S8: Details of unit bactoneuron culturing.** The optimized unit bactoneuron constructs are shown in bold.

| Unit bactoneuron | Cellular device | Transformation of plasmids                                                                                                                                                                                                                                          | Overnight culture condition for transformed bacteria                                                                                                                                                           | Seeding of overnight uninduced culture                                                                                                                    | Induced culture condition                          | Time of propagation for induced culture for various experiments                                                                        |                               |                                       |                               | Number of independent experiments performed in various days |
|------------------|-----------------|---------------------------------------------------------------------------------------------------------------------------------------------------------------------------------------------------------------------------------------------------------------------|----------------------------------------------------------------------------------------------------------------------------------------------------------------------------------------------------------------|-----------------------------------------------------------------------------------------------------------------------------------------------------------|----------------------------------------------------|----------------------------------------------------------------------------------------------------------------------------------------|-------------------------------|---------------------------------------|-------------------------------|-------------------------------------------------------------|
|                  |                 |                                                                                                                                                                                                                                                                     |                                                                                                                                                                                                                |                                                                                                                                                           |                                                    | For fluorescence measurements with respect to the presence ('1' state) and absence ('0') of the input inducers in various combinations | For dose response experiments | For simulation validation experiments | For microscopic experiments   |                                                             |
| BNeu 1           | IAA1            | Chemically competent <i>E. coli</i> DH5αZ1 cells were transformed with plasmids corresponding to the cellular devices, recovered in fresh antibiotic-free LB media for 1 hour at 37 °C in shaking condition (~250 rpm), and grown for 12-15 hours in LB agar plates | We individually inoculated well-separated colonies from the transformed LB plates into fresh LB media supplemented with antibiotics without adding input inducers, and incubated for average 10 hours at 37 °C | The overnight uninduced single-colony LB culture was seeded into fresh LB media supplemented with appropriate antibiotics and inducers in the 100:1 ratio | 37 °C at ~250 rpm in a bacterial shaking incubator | 6 hours                                                                                                                                | 12 hours                      | -                                     | -                             | 3                                                           |
|                  | IAA2            |                                                                                                                                                                                                                                                                     |                                                                                                                                                                                                                |                                                                                                                                                           |                                                    | 6 hours                                                                                                                                | 12 hours                      | -                                     | -                             | 3                                                           |
|                  | IAA3            |                                                                                                                                                                                                                                                                     |                                                                                                                                                                                                                |                                                                                                                                                           |                                                    | 6 hours                                                                                                                                | 12 hours                      | -                                     | -                             | 3                                                           |
|                  | IAA4            |                                                                                                                                                                                                                                                                     |                                                                                                                                                                                                                |                                                                                                                                                           |                                                    | 6 hours                                                                                                                                | 12 hours                      | -                                     | -                             | 3                                                           |
|                  | IAA5            |                                                                                                                                                                                                                                                                     |                                                                                                                                                                                                                |                                                                                                                                                           |                                                    | 6 hours                                                                                                                                | 12 hours                      | -                                     | -                             | 3                                                           |
|                  | IAA6            |                                                                                                                                                                                                                                                                     |                                                                                                                                                                                                                |                                                                                                                                                           |                                                    | 6 hours                                                                                                                                | 12 hours                      | -                                     | -                             | 3                                                           |
|                  | IAA7A           |                                                                                                                                                                                                                                                                     |                                                                                                                                                                                                                |                                                                                                                                                           |                                                    | 12 hours                                                                                                                               | 12 hours                      | -                                     | -                             | 3                                                           |
|                  | IAA8            |                                                                                                                                                                                                                                                                     |                                                                                                                                                                                                                |                                                                                                                                                           |                                                    | 12 hours                                                                                                                               | 12 hours                      | -                                     | -                             | 3                                                           |
|                  | IAA9            |                                                                                                                                                                                                                                                                     |                                                                                                                                                                                                                |                                                                                                                                                           |                                                    | 12 hours                                                                                                                               | 12 hours                      | -                                     | -                             | 3                                                           |
|                  | IAA10           |                                                                                                                                                                                                                                                                     |                                                                                                                                                                                                                |                                                                                                                                                           |                                                    | 12 hours                                                                                                                               | 12 hours                      | -                                     | -                             | 3                                                           |
|                  | IAA11           |                                                                                                                                                                                                                                                                     |                                                                                                                                                                                                                |                                                                                                                                                           |                                                    | 12 hours                                                                                                                               | 12 hours                      | -                                     | -                             | 3                                                           |
|                  | <b>IAA7B</b>    |                                                                                                                                                                                                                                                                     |                                                                                                                                                                                                                |                                                                                                                                                           |                                                    | <b>10+6 hours<sup>a</sup></b>                                                                                                          | <b>10+6 hours<sup>a</sup></b> | <b>10+6 hours<sup>a</sup></b>         | <b>10+6 hours<sup>a</sup></b> | <b>5</b>                                                    |
|                  | IAA7B.A         |                                                                                                                                                                                                                                                                     |                                                                                                                                                                                                                |                                                                                                                                                           |                                                    | -                                                                                                                                      | -                             | -                                     | 10+6 hours <sup>a</sup>       | 1                                                           |
|                  | IAA7B.B         |                                                                                                                                                                                                                                                                     |                                                                                                                                                                                                                |                                                                                                                                                           |                                                    | -                                                                                                                                      | -                             | -                                     | 10+6 hours <sup>a</sup>       | 1                                                           |
| BNeu 2           | INA1A           |                                                                                                                                                                                                                                                                     |                                                                                                                                                                                                                |                                                                                                                                                           |                                                    | 16 hours                                                                                                                               | -                             | -                                     | -                             | 1                                                           |
|                  | INA1B           |                                                                                                                                                                                                                                                                     |                                                                                                                                                                                                                |                                                                                                                                                           |                                                    | 16 hours                                                                                                                               | -                             | -                                     | -                             | 1                                                           |
|                  | INA1C           |                                                                                                                                                                                                                                                                     |                                                                                                                                                                                                                |                                                                                                                                                           |                                                    | 16 hours                                                                                                                               | -                             | -                                     | -                             | 1                                                           |
|                  | INA1D           |                                                                                                                                                                                                                                                                     |                                                                                                                                                                                                                |                                                                                                                                                           |                                                    | 16 hours                                                                                                                               | -                             | -                                     | -                             | 1                                                           |
|                  | INA2A           |                                                                                                                                                                                                                                                                     |                                                                                                                                                                                                                |                                                                                                                                                           |                                                    | 16 hours                                                                                                                               | -                             | -                                     | -                             | 1                                                           |
|                  |                 |                                                                                                                                                                                                                                                                     |                                                                                                                                                                                                                |                                                                                                                                                           |                                                    | 16 hours                                                                                                                               | -                             | -                                     | -                             | 1                                                           |

|         |         |  |  |  |                                            |                                            |                               |                                            |           |
|---------|---------|--|--|--|--------------------------------------------|--------------------------------------------|-------------------------------|--------------------------------------------|-----------|
|         | INA2B   |  |  |  | 16 hours                                   | -                                          | -                             | -                                          | 1         |
|         | INA2C   |  |  |  | 16 hours                                   | -                                          | -                             | -                                          | 1         |
|         | INA2D   |  |  |  | 16 hours                                   | -                                          | -                             | -                                          | 1         |
|         | INA3A   |  |  |  | 16 hours                                   | -                                          | -                             | -                                          | 1         |
|         | INA3B   |  |  |  | 16 hours                                   | -                                          | -                             | -                                          | 1         |
|         | INA3C   |  |  |  | 16 hours                                   | -                                          | -                             | -                                          | 1         |
|         | INA3D   |  |  |  | 16 hours                                   | -                                          | -                             | -                                          | 1         |
|         | INA4    |  |  |  | 16 hours                                   | -                                          | -                             | -                                          | 1         |
|         | INA5A   |  |  |  | 16 hours                                   | -                                          | -                             | -                                          | 1         |
|         | INA5B   |  |  |  | 16 hours                                   | -                                          | -                             | -                                          | 1         |
|         | INA5C   |  |  |  | 16 hours                                   | -                                          | -                             | -                                          | 1         |
|         | INA6A   |  |  |  | 16 hours                                   | 16 hours                                   | -                             | -                                          | 3         |
|         | INA6B   |  |  |  | 16 hours                                   | 16 hours                                   | -                             | -                                          | 3         |
|         | INA6C   |  |  |  | 16 hours                                   | 16 hours                                   | -                             | -                                          | 3         |
|         | INA7A   |  |  |  | <b>16 hours and 10+6 hours<sup>a</sup></b> | <b>16 hours and 10+6 hours<sup>a</sup></b> | <b>10+6 hours<sup>a</sup></b> | <b>10+6 hours<sup>a</sup></b>              | <b>11</b> |
|         | INA7B   |  |  |  | 16 hours                                   | 16 hours                                   | -                             | -                                          | 3         |
|         | INA7C   |  |  |  | 16 hours                                   | -                                          | -                             | -                                          | 1         |
|         | INA7A.A |  |  |  | -                                          | -                                          | -                             | 10+6 hours <sup>a</sup>                    | 1         |
| BNeu 3  | AAH1    |  |  |  | <b>10+6 hours<sup>a</sup></b>              | <b>10+6 hours<sup>a</sup></b>              | <b>10+6 hours<sup>a</sup></b> | <b>10+6 hours<sup>a</sup></b>              | <b>6</b>  |
|         | AAH2    |  |  |  | -                                          | -                                          | -                             | 16 hours                                   | 1         |
| BNeu 4  | IAH1    |  |  |  | <b>10+6 hours<sup>a</sup></b>              | <b>10+6 hours<sup>a</sup></b>              | <b>10+6 hours<sup>a</sup></b> | <b>10+6 hours<sup>a</sup></b>              | <b>5</b>  |
|         | IAH2    |  |  |  | -                                          | -                                          | -                             | 16 hours                                   | 1         |
| BNeu 5  | N1      |  |  |  | <b>10+6 hours<sup>a</sup></b>              | <b>10+6 hours<sup>a</sup></b>              | <b>10+6 hours<sup>a</sup></b> | -                                          | <b>4</b>  |
|         | N2      |  |  |  | -                                          | -                                          | -                             | 10+6 hours <sup>a</sup>                    | 1         |
|         | ANI1A   |  |  |  | 16 hours                                   | -                                          | -                             | -                                          | 1         |
|         | ANI1B   |  |  |  | 16 hours                                   | -                                          | -                             | -                                          | 1         |
|         | ANI1C   |  |  |  | 16 hours                                   | -                                          | -                             | -                                          | 1         |
|         | ANI1D   |  |  |  | 16 hours                                   | -                                          | -                             | -                                          | 1         |
|         | ANI2A   |  |  |  | 16 hours                                   | -                                          | -                             | -                                          | 1         |
|         | ANI2B   |  |  |  | 16 hours                                   | -                                          | -                             | -                                          | 1         |
|         | ANI2C   |  |  |  | <b>16 hours and 10+6 hours<sup>a</sup></b> | <b>16 hours and 10+6 hours<sup>a</sup></b> | <b>10+6 hours<sup>a</sup></b> | <b>10+6 hours<sup>a</sup></b>              | <b>8</b>  |
|         | ANI2D   |  |  |  | 16 hours                                   | -                                          | -                             | -                                          | 1         |
|         | ANI3A   |  |  |  | 16 hours                                   | -                                          | -                             | -                                          | 1         |
|         | ANI3B   |  |  |  | 16 hours                                   | -                                          | -                             | -                                          | 1         |
|         | ANI3C   |  |  |  | 16 hours                                   | -                                          | -                             | -                                          | 1         |
|         | ANI3D   |  |  |  | 16 hours                                   | -                                          | -                             | -                                          | 1         |
|         | ANI4A   |  |  |  | 16 hours                                   | -                                          | -                             | -                                          | 1         |
|         | ANI4B   |  |  |  | 16 hours                                   | -                                          | -                             | -                                          | 1         |
|         | ANI4C   |  |  |  | 16 hours                                   | -                                          | -                             | -                                          | 1         |
|         | ANI4D   |  |  |  | 16 hours                                   | -                                          | -                             | -                                          | 1         |
|         | ANI2C.A |  |  |  | -                                          | -                                          | -                             | 10+6 hours <sup>a</sup>                    | 1         |
| BNeu 7  | AHLB1   |  |  |  | <b>10+6 hours<sup>a</sup></b>              | <b>10+6 hours<sup>a</sup></b>              | -                             | <b>16 hours and 10+6 hours<sup>a</sup></b> | <b>4</b>  |
|         | AHLB2   |  |  |  | -                                          | -                                          | -                             | 10+6 hours <sup>a</sup>                    | 1         |
| BNeu 8  | ATCB1   |  |  |  | <b>10+6 hours<sup>a</sup></b>              | <b>10+6 hours<sup>a</sup></b>              | -                             | -                                          | <b>2</b>  |
|         | ATCB2   |  |  |  | -                                          | -                                          | -                             | 10+6 hours <sup>a</sup>                    | 2         |
| BNeu 9  | ANH1    |  |  |  | <b>10+6 hours<sup>a</sup></b>              | <b>10+6 hours<sup>a</sup></b>              | <b>10+6 hours<sup>a</sup></b> | -                                          | <b>4</b>  |
|         | ANH2    |  |  |  | -                                          | -                                          | -                             | 16 hours                                   | 1         |
| BNeu 10 | INH1    |  |  |  | <b>10+6 hours<sup>a</sup></b>              | <b>10+6 hours<sup>a</sup></b>              | <b>10+6 hours<sup>a</sup></b> | -                                          | <b>4</b>  |
|         | INH2    |  |  |  | -                                          | -                                          | -                             | 16 hours                                   | 1         |

<sup>a</sup>10 hours induction of the 1% (V/V) overnight uninduced culture seeded into LB media with appropriate inducers and antibiotics followed by second seeding of 1% (V/V) of that induced culture into fresh media supplemented with inducers and antibiotics as appropriate and additional induction for 6 hours.

**Table S9: List of bacterial strains and plasmids used in this study.**

| Plasmid name               | Description                       | Ori    | Antibiotic selection | Source               |
|----------------------------|-----------------------------------|--------|----------------------|----------------------|
| E. coli DH5 $\alpha$       | -                                 | -      | -                    | Prof. David McMillen |
| E. coli DH5 $\alpha$ Z1    | -                                 | -      | -                    | Prof. David McMillen |
| pOR-EGFP-12                | Source of EGFP gene and ColE1 Ori | ColE1  | Amp                  | Prof. David McMillen |
| pOR-Luc-31                 | Source of p15A Ori                | p15A   | Cm                   | Prof. David McMillen |
| pmVenus-C1                 | Source of mVenus gene             | pUC    | Kan                  | Clontech             |
| mTFP1-pBad (Plasmid#54553) | Source of mTFP1 gene              | pBR322 | Amp                  | Addgene              |

|                                    |                                                                                                             |        |     |            |
|------------------------------------|-------------------------------------------------------------------------------------------------------------|--------|-----|------------|
| pUCP20T-E2Crimson (Plasmid#78473)  | Source of E2-Crimson gene                                                                                   | pBR322 | Amp | Addgene    |
| mKO2-pBAD (Plasmid#54555)          | Source of mKO2 gene                                                                                         | -      | Amp | Addgene    |
| pBW313lux-hrpR (Plasmid#61436)     | Source of LuxR gene                                                                                         | p15A   | Kan | Addgene    |
| pXC3EGFP                           | EGFP gene with RBS R under P <sub>LUX</sub> promoter: source of P <sub>LUX</sub> promoter                   | p15A   | Cm  | This study |
| pTA1EGFP                           | EGFP gene with RBS R under P <sub>LtetO-1</sub> promoter                                                    | pUC    | Amp | [1]        |
| pTA2EGFP                           | EGFP gene with RBS R under P <sub>LtetO-1</sub> promoter                                                    | ColE1  | Amp | [1]        |
| pTA2E2-Crimson                     | E2-Crimson gene with RBS R under P <sub>LtetO-1</sub> promoter                                              | ColE1  | Amp | This study |
| pRC3EGFP                           | EGFP gene with RBS R under P <sub>R</sub> promoter                                                          | p15A   | Cm  | [1]        |
| pRC3MKO2                           | mKO2 gene with RBS R under P <sub>R</sub> promoter                                                          | p15A   | Cm  | This study |
| pTA2cI                             | Source of wild type CI gene                                                                                 | ColE1  | Amp | [1]        |
| pRA1SEGFPTcIfm                     | Source of frame-shifted CI gene                                                                             | pUC    | Amp | [1]        |
| pLA2ScIfmTcIfm                     | Frame-shifted CI gene with RBS R under both P <sub>LlacO-1</sub> promoter and P <sub>LtetO-1</sub> promoter | ColE1  | Amp | [1]        |
| pP <sub>IAA</sub> 1A1EGFP          | EGFP gene with RBS R under P <sub>IAA</sub> 1promoter                                                       | pUC    | Amp | This study |
| pP <sub>IAA</sub> 2A1EGFP          | EGFP gene with RBS R under P <sub>IAA</sub> 2promoter                                                       | pUC    | Amp | This study |
| pP <sub>IAA</sub> 3A1EGFP          | EGFP gene with RBS R under P <sub>IAA</sub> 3promoter                                                       | pUC    | Amp | This study |
| pP <sub>IAA</sub> 4A1EGFP          | EGFP gene with RBS R under P <sub>IAA</sub> 4promoter                                                       | pUC    | Amp | This study |
| pP <sub>IAA</sub> 5A1EGFP          | EGFP gene with RBS R under P <sub>IAA</sub> 5promoter                                                       | pUC    | Amp | This study |
| pP <sub>IAA</sub> 6A1EGFP          | EGFP gene with RBS R under P <sub>IAA</sub> 6promoter                                                       | pUC    | Amp | This study |
| pP <sub>IAA</sub> 7A1EGFP          | EGFP gene with RBS R under P <sub>IAA</sub> 7promoter                                                       | pUC    | Amp | This study |
| pP <sub>IAA</sub> 7C3EGFP          | EGFP gene with RBS R under P <sub>IAA</sub> 7promoter                                                       | p15A   | Cm  | This study |
| pP <sub>IAA</sub> 7C3mVenus        | mVenus gene with RBS R under P <sub>IAA</sub> 7promoter                                                     | p15A   | Cm  | This study |
| pP <sub>IAA</sub> 7C3E2-Crimson    | E2-Crimson gene with RBS R under P <sub>IAA</sub> 7promoter                                                 | p15A   | Cm  | This study |
| pP <sub>IAA</sub> 8A1EGFP          | EGFP gene with RBS R under P <sub>IAA</sub> 8promoter                                                       | pUC    | Amp | This study |
| pP <sub>IAA</sub> 9A1EGFP          | EGFP gene with RBS R under P <sub>IAA</sub> 9promoter                                                       | pUC    | Amp | This study |
| pP <sub>IAA</sub> 10A1EGFP         | EGFP gene with RBS R under P <sub>IAA</sub> 10promoter                                                      | pUC    | Amp | This study |
| pP <sub>IAA</sub> 11A1EGFP         | EGFP gene with RBS R under P <sub>IAA</sub> 11promoter                                                      | pUC    | Amp | This study |
| pP <sub>INA</sub> 1A1EGFP          | EGFP gene with RBS R under P <sub>INA</sub> 1promoter                                                       | pUC    | Amp | This study |
| pP <sub>INA</sub> 2A1EGFP          | EGFP gene with RBS R under P <sub>INA</sub> 2promoter                                                       | pUC    | Amp | This study |
| pP <sub>INA</sub> 3A1EGFP          | EGFP gene with RBS R under P <sub>INA</sub> 3promoter                                                       | pUC    | Amp | This study |
| pP <sub>INA</sub> 4A1EGFP          | EGFP gene with RBS R under P <sub>INA</sub> 4promoter                                                       | pUC    | Amp | This study |
| pP <sub>INA</sub> 5A2EGFP(F)       | EGFP gene with RBS R under P <sub>INA</sub> 5promoter (Forward direction)                                   | ColE1  | Amp | This study |
| pP <sub>INA</sub> 6A2EGFP(F)       | EGFP gene with RBS R under P <sub>INA</sub> 6promoter (Forward direction)                                   | ColE1  | Amp | This study |
| pP <sub>INA</sub> 7A2EGFP(F)       | EGFP gene with RBS R under P <sub>INA</sub> 7promoter (Forward direction)                                   | ColE1  | Amp | This study |
| pP <sub>INA</sub> 7A2mTFP1(F)      | mTFP1 gene with RBS R under P <sub>INA</sub> 7promoter (Forward direction)                                  | ColE1  | Amp | This study |
| pP <sub>INA</sub> 7A2E2-Crimson(R) | E2-Crimson gene with RBS R under P <sub>INA</sub> 7promoter (Reverse direction)                             | ColE1  | Amp | This study |
| pP <sub>ANI</sub> 1A2EGFP          | EGFP gene with RBS R under P <sub>ANI</sub> 1promoter                                                       | ColE1  | Amp | This study |
| pP <sub>ANI</sub> 2A2EGFP          | EGFP gene with RBS R under P <sub>ANI</sub> 2promoter                                                       | ColE1  | Amp | This study |
| pP <sub>ANI</sub> 2A2E2-Crimson    | E2-Crimson gene with RBS R under P <sub>ANI</sub> 2promoter                                                 | ColE1  | Amp | This study |
| pP <sub>ANI</sub> 2A2tdTomato(F)   | tdTomato gene with RBS R under P <sub>ANI</sub> 2promoter (Forward direction)                               | ColE1  | Amp | This study |
| pP <sub>ANI</sub> 3A2EGFP          | EGFP gene with RBS R under P <sub>ANI</sub> 3promoter                                                       | ColE1  | Amp | This study |
| pP <sub>ANI</sub> 4A2EGFP          | EGFP gene with RBS R under P <sub>ANI</sub> 4promoter                                                       | ColE1  | Amp | This study |
| pP <sub>AAH</sub> C3EGFP(R)        | EGFP gene with RBS R under P <sub>AAH</sub> promoter (Reverse direction)                                    | p15A   | Cm  | This study |
| pP <sub>AAH</sub> C3RBSHEGFP(R)    | EGFP gene with RBS RH under P <sub>AAH</sub> promoter (Reverse direction)                                   | p15A   | Cm  | This study |
| pP <sub>IAH</sub> C3EGFP(R)        | EGFP gene with RBS R under P <sub>IAH</sub> promoter                                                        | p15A   | Cm  | This study |
| pTA2RBSC1EGFP                      | EGFP gene with RBS RC1 under P <sub>LtetO-1</sub> promoter                                                  | ColE1  | Amp | This study |
| pTA2RBSC2EGFP                      | EGFP gene with RBS RC2 under P <sub>LtetO-1</sub> promoter                                                  | ColE1  | Amp | This study |
| pTA2RBSC3EGFP                      | EGFP gene with RBS RC3 under P <sub>LtetO-1</sub> promoter                                                  | ColE1  | Amp | This study |
| pTC3cI                             | Wild type CI gene with RBS R under P <sub>LtetO-1</sub> promoter                                            | p15A   | Cm  | [1]        |
| pTC3RBSC1cI                        | Wild type CI gene with RBS RC1 under P <sub>LtetO-1</sub> promoter                                          | p15A   | Cm  | This study |
| pTC3RBSC2cI                        | Wild type CI gene with RBS RC2 under P <sub>LtetO-1</sub> promoter                                          | p15A   | Cm  | This study |
| pTC3RBSC3cI                        | Wild type CI gene with RBS RC3 under P <sub>LtetO-1</sub> promoter                                          | p15A   | Cm  | This study |
| pLC3cI                             | Wild type CI gene with RBS R under P <sub>LlacO-1</sub> promoter                                            | p15A   | Cm  | This study |
| pLC3RBSC1cI                        | Wild type CI gene with RBS RC1 under P <sub>LlacO-1</sub> promoter                                          | p15A   | Cm  | This study |
| pLC3RBSC2cI                        | Wild type CI gene with RBS RC2 under P <sub>LlacO-1</sub> promoter                                          | p15A   | Cm  | This study |
| pLC3RBSC3cI                        | Wild type CI gene with RBS RC3 under P <sub>LlacO-1</sub> promoter                                          | p15A   | Cm  | This study |
| pTA2LuxR                           | LuxR gene with RBS R under P <sub>LtetO-1</sub> promoter                                                    | ColE1  | Amp | [2]        |

|                                            |                                                                                                                                                         |       |     |            |
|--------------------------------------------|---------------------------------------------------------------------------------------------------------------------------------------------------------|-------|-----|------------|
| pJA2LuxR(F)                                | LuxR gene with RBS R under BBa_J23102 promoter (Forward direction)                                                                                      | ColE1 | Amp | This study |
| pJA2LuxR(R)                                | LuxR gene with RBS R under BBa_J23102 promoter (Reverse direction)                                                                                      | ColE1 | Amp | This study |
| pJA2LuxR(F)P <sub>INA7</sub> E2-Crimson(R) | LuxR gene with RBS R under BBa_J23102 promoter (Forward direction) with E2-Crimson gene with RBS R under P <sub>INA7</sub> promoter (Reverse direction) | ColE1 | Amp | This study |
| pP <sub>ANI2A</sub> 2tdTomato(F)JLuxR(R)   | tdTomato gene with RBS R under P <sub>ANI2</sub> promoter (Forward direction) with LuxR gene with RBS R under BBa_J23102 promoter (Reverse direction)   | ColE1 | Amp | This study |
| pXC3cIfm                                   | Frame-shifted CI gene with RBS R under P <sub>LUX</sub> promoter                                                                                        | p15A  | Cm  | This study |
| pX <sup>+</sup> C3EGFP                     | EGFP gene with RBS R under P <sub>LUX<sup>+</sup></sub> promoter                                                                                        | p15A  | Cm  | This study |
| pX <sup>+</sup> C3E2-Crimson               | E2-Crimson gene with RBS R under P <sub>LUX<sup>+</sup></sub> promoter                                                                                  | p15A  | Cm  | This study |
| pA2MCS                                     | Only MCS                                                                                                                                                | ColE1 | Amp | This study |
| pC3MCS                                     | Only MCS                                                                                                                                                | p15A  | Cm  | This study |

## Reference

1. K. Sarkar, S. Mukhopadhyay, D. Bonnerjee, R. Srivastava and S. Bagh, *J. Biol. Eng.*, 2019, **13**, DOI: 10.1186/s13036-019-0151-x.
2. D. Bonnerjee, S. Mukhopadhyay, and S. Bagh, *Bioconjugate Chem.*, 2019, **30**, 3013-3020.
3. T. S. Moon, C. Lou, A. Tamsir, B. C. Stanton and C. A. Voigt, *Nature*, 2012, **491**, 249–253.
4. R. Lutz and H. Bujard, *Nucleic Acids Res.*, 1997, **25**, 1203–1210.
5. H. M. Salis, E. A. Mirsky and C. A. Voigt, *Nat. Biotechnol.*, 2009, **27**, 946–950.
6. V. S. Mahajan, V. D. Marinescu, B. Chow, A. D. Wissner-Gross and P. Carr iGEM group: Antiquity, Data from “Registry of Standard Biological Parts”, 2003, [http://parts.igem.org/Part:BBa\\_B0034](http://parts.igem.org/Part:BBa_B0034).
7. K. F. Murphy, G. Bala’zsi and J. J. Collins, *Proc. Natl. Acad. Sci. U.S.A.*, 2007, **104**, 12726–12731.
